1  
2  
3  
4  
5  
6  
7  
8  
9  
10  
11  
12  
13  
14  
15  
16  
17  
18  
19  
20  
21  
22  
23  
24  
25  
26

Title:

**HIV-1 initiates genomic RNA packaging in a unique subset of host RNA granules**

Motoko Tanaka, Brook C. Barajas, Bridget A. Robinson, Daryl Phuong, Kasana Chutiraka, Jonathan C. Reed, and Jaisri R. Lingappa

Department of Global Health, University of Washington, Seattle, WA 98109

Short Title:

HIV-1 gRNA packaging occurs in unique host RNA granules

27

28

29 **Abbreviations used:**

30  $\alpha$ ABCE1, antibodies directed against ABCE1

31  $\alpha$ DDX6, antibodies directed against DDX6

32  $\alpha$ Gag, antibodies directed against Gag

33  $\alpha$ GFP, antibodies directed against GFP

34 coIP, coimmunoprecipitation

35 gRNA, HIV-1 genomic RNA

36 IEM, immunoelectron microscopy

37 IP, immunoprecipitation

38 LZ, leucine zipper

39 NC, nucleocapsid

40 O-FISH, oligo fluorescent in situ hybridization

41 O-FISH PLA, oligo fluorescent in situ hybridization coupled with the proximity ligation assay

42 PLA, proximity ligation assay

43 PM, plasma membrane

44 PuroHS, treatment with puromycin plus high salt

45 RNPC, ribonucleoprotein

46 RT-qPCR

47 SRP, signal recognition particle

48 VLPs, virus-like particles

49 WB, Western blot

50 WT, wild type

51

52

53 **Abstract**

54 How HIV-1 genomic RNA (gRNA) is packaged into assembling virus remains unclear. Here, we use  
55 biochemical and *in situ* approaches to identify the complex in which the capsid protein Gag first  
56 associates with gRNA, termed the packaging initiation complex. First, we show that in the absence of  
57 assembling Gag, non-nuclear non-translating gRNA is nearly absent from the soluble fraction of provirus-  
58 expressing cells, and is found instead primarily in complexes  $\geq 30S$ . When we express a Gag mutant  
59 known to be arrested at packaging initiation, we find only one complex containing Gag and gRNA; thus,  
60 this complex corresponds to the packaging initiation complex. This  $\sim 80S$  complex also contains two  
61 cellular facilitators of assembly, ABCE1 and the RNA granule protein DDX6, and therefore corresponds  
62 to a co-opted host RNA granule and a previously described capsid assembly intermediate. Additionally,  
63 we find this granule-derived packaging initiation complex in HIV-1-infected H9 T cells, and demonstrate  
64 that wild-type Gag forms both the packaging initiation complex and a larger granule-derived complex  
65 corresponding to a late packaging/assembly intermediate. We also demonstrate that packaging initiation  
66 complexes are far more numerous than P bodies *in situ*. Finally, we show that Gag enters the  $\sim 80S$   
67 granule to form the packaging initiation complex via a two-step mechanism. In a step that is independent  
68 of a gRNA-binding domain, Gag enters a broad class of RNA granules, most of which lack gRNA. In a  
69 second step that is dependent on the gRNA-binding nucleocapsid domain of Gag or a heterologous  
70 gRNA-binding domain, Gag enters a gRNA-containing subset of these granules. Thus, we conclude that  
71 packaging in cells does not result from random encounters between Gag and gRNA; instead our data  
72 support a fundamentally different model in which Gag is directed to gRNA within a unique host RNA  
73 granule to initiate this critical event in HIV-1 replication.

74

75

76

77

78

79 **Nontechnical Summary**

80 To form infectious virus, the HIV-1 capsid protein Gag must associate with and package the viral  
81 genomic RNA (gRNA) during the virus assembly process. HIV-1 Gag first associates with gRNA in the  
82 cytoplasm, forming a complex termed the packaging initiation complex; this complex subsequently  
83 targets to the plasma membrane where Gag completes the assembly and packaging process before  
84 releasing the virus from the cell. Although the packaging initiation complex is critical for infectious virus  
85 formation, its identity and composition, and the mechanism by which it is formed, remain unknown.  
86 Here we identify the packaging initiation complex, and demonstrate that it corresponds to a host RNA  
87 granule that is co-opted by the virus. RNA granules are diverse complexes utilized by host cells for all  
88 aspects of RNA storage and metabolism besides translation. Our study also defines the mechanism by  
89 which HIV-1 Gag enters this host RNA granule to form the packaging initiation complex, and reveal that  
90 it involves two steps that depend on different regions of Gag. Our finding that Gag co-opts a poorly  
91 studied host complex to first associate with gRNA during packaging provides a new paradigm for  
92 understanding this critical event in the viral life cycle.

93

94

95

96

97

98

99

100

101

102

103

104

105 **Introduction**

106 For released HIV-1 particles to be infectious, two copies of full-length genomic RNA (gRNA)  
107 must be packaged during assembly of the immature HIV-1 capsid. Capsid assembly involves  
108 oligomerization of Gag in the cytoplasm followed by targeting of Gag via its N-terminal myristate to the  
109 plasma membrane (PM), where ~3000 Gag proteins multimerize to form each immature capsid.  
110 Packaging of gRNA is initiated when the structural protein Gag first associates with gRNA during  
111 assembly, and requires the nucleocapsid domain (NC) of Gag as well as specific encapsidation signals in  
112 gRNA (reviewed in [1]). The gRNA-containing immature capsids subsequently undergo budding,  
113 release, and maturation (reviewed in [2]). In addition to being used for packaging, HIV-1 gRNA in the  
114 cytoplasm is also used for translation of Gag and GagPol (reviewed in [1]). Translation and packaging  
115 are thought to be mutually exclusive, with the shift between these processes likely controlled by a gRNA  
116 conformational switch (reviewed in [3,4]). Thus, gRNAs that are packaged are likely to be non-  
117 translating gRNAs with unique structural features [5]. In the absence of gRNA, capsid assembly and  
118 release still occur but the resulting virus is non-infectious [6].

119 The process by which HIV-1 Gag finds gRNA at the start of packaging is of great interest.  
120 Biochemical and imaging studies have established that a Gag dimer or oligomer first associates with  
121 gRNA in the cytoplasm, forming a complex termed the packaging initiation complex [7]. Subsequently,  
122 the packaging initiation complex targets to the PM where Gag multimerizes to form the immature capsid  
123 [8]. Live imaging studies have defined the diffusion characteristics of Gag and gRNA in cells [9,10]; but,  
124 notably, the exact components in these diffusing complexes have not been identified. Thus, although  
125 formation of the packaging initiation complex is critical for production of infectious virus, the  
126 composition of the packaging initiation complex and the mechanism by which Gag and gRNA first  
127 associate to form this complex are not known.

128 Here we used our understanding of HIV-1 capsid assembly to determine how the packaging  
129 initiation complex is formed. Our previous studies showed that assembling HIV-1 Gag co-opts RNA  
130 granules [11], which are host ribonucleoprotein complexes (RNPCs) that contain non-translating mRNAs.

131 While all translating cellular mRNAs are in monosomes or polysomes, non-translating cellular mRNAs  
132 reside in RNA granules (reviewed in [12]). Numerous types of RNA granules exist; these granules are  
133 distinguished by sizes and marker proteins, and function in silencing, storage, degradation, stress, and  
134 other events in RNA metabolism. Some RNA granules, such as P bodies and stress granules, are easily  
135 visible by light microscopy, but others are smaller and poorly understood. We found that after co-opting  
136 host RNA granules, Gag remains in these granules during immature capsid assembly, forming a  
137 sequential pathway of assembly intermediates named by their sedimentation values of ~80S, ~150S, and  
138 ~500S (reviewed in [13]). Both the original co-opted host RNA granule and the subsequently formed  
139 assembly intermediates contain multiple RNA granule proteins, including the DEAD-box RNA helicase  
140 DDX6 [11].

141 These previous studies led us to what we term the RNA granule model of packaging. In this  
142 model, we propose that, like non-translating cellular mRNA, non-translating gRNAs are sequestered  
143 within RNA granules; thus, Gag must enter gRNA-containing host RNA granules to initiate gRNA  
144 packaging. Localizing packaging to RNA granules could be advantageous to the virus in a number of  
145 ways: it would sequester gRNA from the host innate immune system, concentrate Gag at the site where  
146 gRNA is located, and place packaging and assembly in proximity with host enzymes that could facilitate  
147 those events. In keeping with the latter possibility, two of the host proteins present in both the assembly  
148 intermediates and the host RNA granules from which they are derived are cellular facilitators of HIV-1  
149 capsid assembly – the ATP-binding cassette protein E1 (ABCE1) and DDX6 [11,14].

150 Here we identified the packaging initiation complex and tested the RNA granule model of HIV-1  
151 packaging. First we showed that all non-translating HIV-1 gRNAs are in large complexes, even in the  
152 absence of assembling Gag. Using a Gag mutant that is arrested after packaging initiation, we  
153 demonstrated that only one complex contains Gag associated with gRNA, and therefore fits the definition  
154 of the packaging initiation complex. This complex is an ~80S RNA granule that also contains the cellular  
155 facilitators of assembly, ABCE1 and DDX6. *In situ* studies confirmed these findings and revealed that  
156 the packaging initiation complexes are smaller and more numerous than P bodies. Additionally, we

157 examined the mechanism by which the packaging initiation complex is formed, and found that Gag uses  
158 both a gRNA-binding-independent and a gRNA-binding-dependent step to localize to gRNA-containing  
159 RNA granules. Finally, we confirmed the physiological relevance of the RNA-granule derived packaging  
160 intermediates by identifying them in a chronically infected human T cell line. Together, our data argue  
161 that packaging of the HIV-1 genome is initiated only after Gag localizes to a unique and poorly  
162 understood subclass of host RNA granules that contains non-translating gRNA.

163

## 164 **Results**

### 165 **Confirmation of packaging phenotypes for proviruses expressing WT Gag and Gag mutants**

166 To study gRNA packaging, we used a variety of gRNA expression systems (Fig 1A) that  
167 produce either WT Gag or Gag mutants with known phenotypes (Fig 1B). WT Gag forms the packaging  
168 initiation complex and completes assembly to produce virus-like particles (VLPs) that contain gRNA.  
169 Two assembly-defective Gag mutants, MACA Gag and G2A Gag, were studied because they arrest Gag  
170 assembly before or after packaging initiation complex formation, respectively. The assembly-  
171 incompetent MACA Gag fails to form the packaging initiation complex because it lacks the gRNA-  
172 binding NC domain (reviewed in [13,15,16]). In contrast, the assembly-defective G2A Gag forms the  
173 cytoplasmic packaging initiation complex [7] but is arrested in the cytoplasm due to a point mutation that  
174 prevents the myristoylation required for PM targeting [17-19]. We also analyzed the assembly-competent  
175 but gRNA-interaction-deficient HIV-1 GagZip chimera. In place of the gRNA-binding NC domain,  
176 GagZip contains a dimerizing leucine zipper (LZ), which supports assembly but not RNA association [20-  
177 24]; thus GagZip produces VLPs that lack gRNA, and would not be expected to form the packaging  
178 initiation complex. GagZip is of interest since a packaging model should be able to explain how GagZip  
179 successfully assembles capsids but fails to incorporate gRNA.

180 We confirmed the VLP phenotypes described above following transfection of WT and mutant  
181 proviruses (Fig 1A, Set I) into COS-1 (Fig 1C) by analyzing cell lysates and VLPs for Gag and gRNA  
182 copies (Fig 1C, top). Additionally, the predicted packaging initiation complex phenotypes of these four

183 Gag constructs (Fig 1B) were confirmed by quantifying gRNA copies associated with intracellular Gag,  
184 using immunoprecipitation (IP) from cell lysates with antibody directed against Gag ( $\alpha$ Gag), followed by  
185 RTqPCR of IP eluates (Fig 1C, bottom).

186

### 187 **Non-translating gRNAs are in diverse large complexes even in the absence of assembling Gag**

188 To date, the spectrum of gRNA-containing complexes present in the cytoplasm has not been  
189 defined. Our model predicts that gRNA behaves like mRNA; thus, even in the absence of Gag we would  
190 expect to find that all HIV-1 gRNA is either in translating complexes or in diverse non-translating  
191 RNPCs. Moreover, because gRNA, like mRNA, should associate with ribonucleoproteins to form  
192 relatively large complexes, we would not expect to find gRNA in the soluble fraction of cell lysates,  
193 which contains monomers, dimers, and small oligomers. To test these predictions, we transfected cells  
194 with MACA provirus (Fig 2A), which expresses an otherwise full-length gRNA encoding a truncated  
195 assembly-incompetent MACA Gag protein that is arrested as an  $\sim$ 10S complex [25]. These cells were  
196 harvested under conditions that removed nuclei, kept RNPCs intact, and solubilized any membranes  
197 associated with proteins. Lysates were analyzed by velocity sedimentation followed by RT-qPCR to  
198 determine the approximate size (S value) of all non-nuclear RNPCs containing gRNA (or other RNAs).  
199 This analysis was performed with both translating and non-translating complexes intact, and also  
200 following disruption of translating ribosomes with *puromycin* and *high salt treatment* (PuroHS). PuroHS  
201 releases nascent chains from ribosomes, dissociates ribosomal subunits, and releases mRNA [26,27],  
202 which then likely shifts into non-translating RNPCs [28]. Thus, PuroHS treatment should allow analysis  
203 of only non-translating gRNAs, the population likely to undergo packaging.

204 We first determined the efficacy of ribosome disruption by PuroHS. To do this, we analyzed  
205 MACA gradient fractions for 28S rRNA, a marker for the 60S large ribosomal subunit (Fig 2B),  
206 following PuroHS treatment or in the absence of PuroHS treatment. As expected, in the absence of  
207 PuroHS treatment (Fig 2B, open green circles), 28S rRNA migrated almost entirely in the position of  
208 monosomes ( $\sim$ 80S) and polysomes ( $>$ 150S). Following PuroHS treatment (Fig 2B, solid green squares),



209 28S rRNA migrated almost entirely in an ~60S peak representing the dissociated large ribosomal subunit,  
210 with almost no 28S rRNA remaining in the polysome region (>150S). The near complete absence of 28S  
211 rRNA in the polysome region after PuroHS treatment indicated highly effective ribosome disassembly.  
212 From these data we concluded that PuroHS disassembles most 28S-containing monosomes and  
213 polysomes into large and small ribosomal subunits. As a negative control, the same fractions were  
214 examined for 7SL RNA, a marker for signal recognition particle (SRP), which is a ribosome-independent  
215 ~11S RNPC [29]. As expected, PuroHS treatment did not affect the migration of 7SL (Fig 2B, compare  
216 open orange circles vs. solid orange squares). Thus, RNPCs of different sizes (monosomes, polysomes,  
217 and SRP) remain intact following cell lysis and velocity sedimentation, and PuroHS treatment disrupted  
218 translating RNPCs, but not ribosome-independent RNPCs.

219 Analysis of HIV-1 gRNA in these same MACA fractions revealed that, with or without PuroHS  
220 treatment, almost no HIV-1 gRNA was in the soluble fraction ( $\leq 20S$ ) and very little was in small  
221 complexes of  $< 30S$  (Fig 2C, compare open blue circles to solid blue squares). Thus, at steady state in the  
222 absence of assembling Gag, most gRNA is in complexes  $\geq 30S$ , consisting of translating complexes and  
223 non-translating complexes. This contrasted with MACA protein, which was found almost entirely in the  
224 soluble fraction ( $\leq 20S$ ; Fig 2C, grey triangles). Following PuroHS treatment,  $> 95\%$  of gRNA was in  
225 diverse RNPCs  $\geq 30S$  that formed a broad peak centered at ~60S. Comparison of gRNA data obtained  
226 with and without PuroHS treatment suggests that approximately 30% of total gRNA was in translating  
227 polysomes, defined as complexes  $\geq 150S$  that are lost upon PuroHS. Moreover, PuroHS treatment caused  
228 HIV-1 gRNA that was in polysomes ( $\geq 150S$ ) to shift into non-translating RNPCs of ~30-150S, some of  
229 which are present even in the absence of PuroHS treatment (Fig. 2C). When the same gradient fractions  
230 were analyzed for HIV-1 subgenomic Tat mRNA and a cellular mRNA (GAPDH), a pattern similar to  
231 that of HIV-1 gRNA was observed, with or without PuroHS treatment (compare Fig 2D, E to 2C),  
232 although perhaps with GAPDH mRNA forming more  $\geq 150S$  complexes after puromycin treatment,  
233 which could correspond to non-translating RNA granules or residual polysomes not disrupted by  
234 puromycin. Thus, the distribution of translating and non-translating gRNA-containing complexes

235 resembles the distribution of cellular mRNAs and subgenomic viral mRNAs. Because packaging likely  
236 involves non-translating gRNA, as explained above, all subsequent lysate experiments utilized PuroHS to  
237 allow analysis of almost exclusively non-translating gRNA.

238

### 239 **G2A Gag enters gRNA-containing granules to form the ~80S packaging initiation complex**

240 Having shown that non-translating gRNA is primarily in RNPCs  $\geq 30S$ , and does not comigrate  
241 with soluble packaging-incompetent MACA Gag, we next asked whether a packaging-initiation-  
242 competent Gag enters one of the  $\geq 30S$  RNPCs to form the packaging initiation complex. Because the  
243 packaging initiation complex is the complex in which Gag and gRNA first associate, we would expect the  
244 packaging initiation complex to have two key features – first, gRNA and Gag should comigrate in the  
245 fractions that contain the packaging initiation complex, and secondly, gRNA and Gag in these fractions  
246 should be in association with each other, through direct or indirect interactions, as indicated by  
247 coimmunoprecipitation (coIP). In addition, if the packaging initiation complex is a co-opted RNA  
248 granule, we would expect gRNA to associate with RNA granule proteins in these fractions.

249 To help identify the packaging initiation complex, we utilized a provirus that expresses G2A Gag.  
250 G2A Gag forms the cytoplasmic complex that has been defined as the packaging initiation complex [7],  
251 and is likely arrested in the form of the packaging initiation complex due to its inability to target to  
252 membranes. To demonstrate comigration of gRNA with packaging-initiation-competent G2A Gag, cells  
253 expressing MACA vs. G2A proviruses (Fig 1A, Set I) to similar steady state levels (Fig 3A), were  
254 analyzed by velocity sedimentation followed by quantitation of gRNA in gradient fractions (Fig 3B).  
255 Cells expressing either the MACA or G2A provirus displayed the same distribution of total non-nuclear  
256 non-translating gRNA, with gRNA mainly in ~30-80S RNPCs in both cases (Fig 3B, graph). In contrast,  
257 the distribution of the MACA vs. G2A Gag protein across the gradient differed dramatically (Fig 3B, WB  
258 below graph), as observed previously [25,30]. While MACA protein was almost entirely in the soluble  
259 fraction (Fig 3B, MACA WB, fractions 1 - 3), G2A Gag protein was present in both the  $\leq 20S$  soluble  
260 fraction and in ~40-80S complexes (Fig 3B, G2A WB, fractions 8 – 12). Thus, a population of

261 packaging-initiation-competent G2A Gag protein comigrated with gRNA in ~40-80S RNPCs, in contrast  
262 to the MACA protein, which is not competent for packaging initiation.

263 To determine whether gRNA in the ~40-80S RNPCs is associated with comigrating G2A Gag,  
264 gradient fractions in Fig 3B were subjected to  $\alpha$ Gag IP, followed by quantitation of gRNA in IP eluates  
265 (Fig 3C). Note that all IPs in this study were performed under native conditions, and are thus expected to  
266 pull down the protein targeted by the antibody as well as other components stably associated with the  
267 target protein through direct or indirect interactions. Even though  $\alpha$ Gag coimmunoprecipitated MACA  
268 effectively (Fig 1C), no gRNA was associated with MACA by  $\alpha$ Gag IP in any fraction, as expected given  
269 that MACA does not comigrate with gRNA (Fig 3B, compare graph to blot). Similarly, gRNA was not  
270 associated with soluble G2A Gag protein (in the  $\leq 20$ S region) by coIP, as expected given the lack of  
271 gRNA in the soluble fractions. Thus, the packaging initiation complex was not found in soluble fractions.  
272 In contrast, G2A Gag protein was strongly associated with gRNA by  $\alpha$ Gag coIP in a broad RNPC that  
273 peaked at ~80S, heretofore referred to as the ~80S complex (Fig 3C, graph). From these data, we  
274 conclude only one RNPC - the ~80S complex - fits the definition of the packaging initiation complex in  
275 that it contains G2A Gag associated with gRNA.

276 Next we asked whether this ~80S RNPC is an RNA granule, by determining if gRNA in this  
277 complex is associated with the RNA granule protein, DDX6. DDX6 is a marker for P bodies [31], but is  
278 also found in ~80S and ~500S RNA granules that are co-opted by Gag during assembly and contain the  
279 host enzyme ABCE1 [11]. In cells expressing G2A provirus (Fig 3D), gRNA was again observed  
280 primarily in the ~40-80S region of gradients (Fig 3E). Moreover, antibody to DDX6 ( $\alpha$ DDX6)  
281 coimmunoprecipitated gRNA from a complex that peaks in the ~80S region (Fig 3F). These findings are  
282 consistent with our previous observation that DDX6 is associated with Gag in the ~80S assembly  
283 intermediate by coIP [11]. Taken together, these data suggest that to form the packaging initiation  
284 complex, packaging-competent G2A Gag must enter an ~80S DDX6-containing RNA granule that  
285 contains non-translating gRNA. Notably, gRNA is absent from the  $<20$ S fraction of the cell lysate, with  
286 or without PuroHS treatment (Fig 2C), and in the presence or absence of packaging-initiation-competent

287 Gag (Fig 3B); thus we could find no evidence of a small complex containing only gRNA and a dimer of  
288 Gag.

289

290 **WT Gag forms the ~80S packaging initiation complex and ~500S late packaging intermediate,**  
291 **which contain RNA granule proteins**

292 Previously, we used pulse-chase and mutational approaches to demonstrate that WT Gag forms  
293 an ~80S early capsid assembly intermediate, a ~500S late assembly intermediate, and a ~750S complex  
294 that corresponds to a completed immature capsid [25,32-34]. Additionally, we had used coIPs to  
295 demonstrate that the ~80S and ~500S assembly intermediates contain the assembly facilitators ABCE1  
296 and DDX6 in association with Gag [11,14]. If the ~80S assembly intermediate is also the earliest  
297 packaging intermediate, as suggested by the data above (Fig 3), then we would expect the ~500S  
298 assembly intermediate, which is only found at the PM [25], to be a late packaging intermediate that  
299 contains gRNA in association with targeting-competent Gag. Thus, WT Gag should be associated with  
300 gRNA in both the ~80S packaging initiation complex/early assembly intermediate and the ~500S late  
301 assembly/packaging intermediate, as well as in any intracellular ~750S completed immature capsids that  
302 accumulate prior to virus budding and release. To test these predictions, we needed a method for  
303 immunoprecipitating multimerized Gag. Since diverse Gag antibodies fail to IP multimerized Gag  
304 because of epitope masking [35], we utilized  $\alpha$ GFP IP of GFP-tagged, codon-optimized Gag (GagGFP)  
305 cotransfected with V1B, a modified proviral construct that expresses a gRNA containing all the signals  
306 needed for packaging [7]. Notably, V1B encodes a truncated assembly-incompetent Gag that does not  
307 interfere with assembly of GagGFP expressed in trans. These constructs coexpressed *in trans*  
308 (GagGFP/V1B, Fig 1A, Set II) have been well vetted in live imaging studies [8]. Use of this *in trans*  
309 system also allowed us to express a single well-studied V1B genomic construct with different Gag  
310 constructs. As expected, coexpression of GagGFP and V1B constructs resulted in the same VLP and  
311 packaging-initiation-complex phenotypes observed for proviral constructs in Fig 1B (Fig S1A).

312 To test whether WT Gag forms the ~80S putative packaging initiation complex and larger ~500S  
313 and ~750S complexes, we analyzed cell lysates coexpressing either WT Gag with V1B or G2A GagGFP  
314 with the V1B genomic construct. In this experiment, we used a velocity sedimentation gradient that  
315 allows resolution of early and late assembly intermediates [25,30]. Steady state levels of intracellular  
316 Gag protein were similar for both WT and G2A, as were gRNA levels (Fig 4A). G2A Gag protein  
317 formed only the ~10S and ~80S intermediates (as in Fig 3B); in contrast, at steady state, WT Gag protein  
318 formed both of these complexes as well as the ~500S late assembly intermediate and ~750S completed  
319 capsids (Fig 4B, WB), as shown previously [25,30,32]. Notably, nearly all the gRNA was in the ~80S  
320 complex regardless of whether it was coexpressed with WT Gag or G2A Gag (Fig 4B, graph). IP with  
321  $\alpha$ GFP revealed that both WT and G2A GagGFP were associated with V1B gRNA in the ~80S putative  
322 packaging initiation complex (Fig 4C, graph). Additionally,  $\alpha$ GFP IP showed that WT Gag was also  
323 associated with V1B gRNA in the ~500S late assembly intermediate and the ~750S completed capsids,  
324 both of which are formed by WT Gag but not targeting-defective G2A Gag (Fig 4C, graph). While COS-  
325 1 cells were used in this experiment to avoid endocytosis of completed virus, as previously described  
326 [25], similar results were obtained in human 293T cells expressing WT Gag that were harvested before  
327 significant virus endocytosis had occurred (Fig S2A-C). Additionally, coIP results similar to those shown  
328 in Fig 4C were obtained even in the absence of PuroHS treatment [25]; thus arguing that PuroHS  
329 treatment allows us to study non-translating gRNA without altering the underlying biology. Thus, gRNA  
330 is associated with WT Gag in the ~80S packaging initiation complex, the ~500S late intermediate, and the  
331 ~750S completed immature capsid. These data are consistent with the ~80S complex being both the  
332 packaging initiation complex and an early assembly intermediate, and with the ~500S complex being both  
333 a late packaging intermediate and late assembly intermediate, as would be expected.

334 Thus far, we had shown that 1) both G2A Gag and WT Gag enter an ~80S RNA granule to form  
335 the packaging initiation complex (Fig 3C, 4C; Fig S2C); 2) this ~80S packaging initiation complex  
336 contains the RNA granule protein DDX6 (Fig 3F) and therefore appears to be an RNA granule; and 3)  
337 WT Gag also forms a ~500S packaging/assembly intermediate containing Gag associated with gRNA

338 (Fig 4C; Fig S2C). Additionally, our previous coIP studies had shown that the ~80S and ~500S assembly  
339 intermediates contain Gag in association with the cellular facilitators of assembly ABCE1 and DDX6  
340 [11,14]. If the packaging initiation complex and late packaging intermediate are also assembly  
341 intermediates, we would expect ABCE1 to be associated with gRNA in ~80S and ~500S  
342 packaging/assembly intermediates formed by WT GagGFP. Indeed,  $\alpha$ ABCE1 immunoprecipitated V1B  
343 gRNA from ~80S and ~500S intermediates formed by WT GagGFP (Fig S2D-F), thereby confirming that  
344 these two complexes correspond to previously described ~80S and ~500S assembly intermediates derived  
345 from RNA granules [11,14,25,33]. Thus, gRNA in the ~80S packaging initiation complex and the ~500S  
346 packaging/assembly intermediate is associated with both WT Gag (Fig 4C, Fig S2C) and ABCE1 (Fig  
347 S2F). These data support a model in which Gag enters an RNA granule that contains ABCE1, DDX6,  
348 and gRNA to form the packaging initiation complex and remains associated with this granule as it  
349 completes packaging and assembly.

350

### 351 **gRNA is present in RNA granule-like packaging intermediates in chronically infected T cells**

352 Previously, we showed that in human H9 T cells chronically infected with HIV (H9-HIV), Gag  
353 associates with ABCE1 and DDX6 in ~80S and ~500S complexes by coIP [11]. Here we analyzed H9-  
354 HIV cells on gradients and found that nearly all the non-nuclear non-translating gRNA is in ~80S and  
355 ~500S complexes, and that gRNA in those complexes was associated with ABCE1 by coIP (Fig 4D-F).  
356 Gag was also present in the ~80S and ~500S regions of the gradient, as expected (Fig 4E WB).  
357 Interestingly, at steady state in H9-HIV lysate, the ratio of non-translating gRNA in 80S vs. 500S  
358 intermediates was shifted towards more ~500S gRNA, compared to transfected COS-1 or 293T cells  
359 (compare 4E, F to 4B,C and S2B, C). Together our findings demonstrate that in three different cell types,  
360 including a more physiologically relevant HIV-infected human T cell line, gRNA is only associated with  
361 Gag in RNA granule-derived assembly intermediates. Additionally, our findings raise the possibility that  
362 formation of the late ~500S packaging intermediate occurs more efficiently in human T cells.

363

364 **Gag requires a gRNA-binding domain to enter the subset of granules containing genomic RNA**

365           Given the longstanding observation that the NC domain is required for association of Gag with  
366 gRNA, we would expect NC to be critical for targeting Gag to gRNA-containing RNA granules. To test  
367 this possibility, we took advantage of GagZip, in which NC is replaced with a heterologous leucine zipper  
368 (LZ). GagZip has been used to demonstrate that NC has two functions during immature capsid assembly  
369 - NC binds specifically to gRNA and also promotes oligomerization of Gag via non-specific RNA  
370 association [21,24]. Because LZ promotes direct protein-protein interactions, it substitutes for the  
371 oligomerization function of NC; thus, GagZip is assembly-competent and produces VLPs [22-24].  
372 However, because LZ does not bind to RNA, these GagZip VLPs lack gRNA or other RNAs [23,24].  
373 Interestingly, we found previously that GagZip forms the ~80S and ~500S ABCE1- and DDX6-  
374 containing assembly intermediates [11,22], even though it produces VLPs that lack gRNA (Fig 1C).  
375 These data raised the possibility that GagZip localizes to a broad class of ABCE1- and DDX6-containing  
376 RNA granules, but fails to localize to the subset of these granules that contains gRNA because it lacks the  
377 gRNA-binding NC domain.

378           Before testing this hypothesis, we first confirmed that GagZipGFP, like GagZip, produces VLPs  
379 that lack gRNA when cotransfected with the V1B genome *in trans* (Fig S1A and 1C). In cells transfected  
380 with WT Gag or GagZipGFP, and V1B *in trans* (Fig 1A, Set II constructs), both Gag proteins were  
381 expressed at similar steady state levels as were their gRNAs (Fig 5A), and non-translating V1B gRNA  
382 was primarily in the ~80S RNA granule in both cases (Fig 5B graph). WB confirmed that GagZipGFP  
383 forms a prominent ~500S RNA granule-like assembly intermediate (Fig 5B WB). In addition, previously  
384 we confirmed that GagZip also forms the ~80S RNA granule albeit at lower levels than for WT Gag (in  
385 [22], see Fig 4 dark exposures and Fig 5). Notably,  $\alpha$ GFP coimmunoprecipitated gRNA from ~80S and  
386 ~500S fractions of cells expressing WT GagGFP (as in Fig 4C), but  $\alpha$ GFP failed to coIP gRNA from any  
387 fraction of the GagZipGFP gradient (Fig 5C, graph). Controls showed that  $\alpha$ GFP immunoprecipitated  
388 GagZipGFP protein as effectively as WT GagGFP from ~80S and ~500S fractions (Fig S3A), so the  
389 failure to coIP gRNA cannot be attributed to reduced IP efficiency. These data argue that both WT Gag

390 and GagZip localize to ~80S RNA granules, but WT Gag stably associates with a subset of these RNA  
391 granules that contains gRNA, while GagZip does not stably associate with the gRNA-containing subset of  
392 these granules. Thus, the NC domain is required to form the packaging initiation complex, and acts by  
393 directing Gag to the gRNA-containing granule subset. Moreover, our data suggest that a different region  
394 of Gag (present in GagZip but not in MACA) is responsible for bringing Gag to a broader class of RNA  
395 granules, most of which lack gRNA.

396 Finally, we asked whether we could restore targeting of GagZip to a gRNA-containing RNA  
397 granule subset via a heterologous gRNA-binding domain. Because the V1B genomic RNA contains MS2  
398 stem loops, we reasoned that the MS2 coat protein (MCP), which binds with high affinity to MS2 stem  
399 loops (reviewed in [36]), could serve as a heterologous gRNA-binding domain if inserted into GagZip.  
400 Therefore, we generated a construct, here called GagZipMCP, in which MCP is fused to the C-terminus  
401 of GagZip. Additionally, we showed that GagZipMCP forms VLPs that contain the V1B genome, unlike  
402 GagZip (Fig S3B). When V1B was cotransfected either with GagZip or GagZip MCP, to similar steady  
403 state levels (Fig 5D), and analyzed on gradients, gRNA was found largely in ~80S granules in both cases  
404 (Fig 5E). However,  $\alpha$ GFP coimmunoprecipitated gRNA from ~80S and ~500S fractions formed by  
405 GagZip MCP GFP, but not from the corresponding complexes formed by GagZip, analyzed in parallel  
406 (Fig 5F). Thus, fusion to MCP, a heterologous gRNA-binding domain, redirected GagZip to the specific  
407 subset of RNA granules that contains gRNA, resulting in formation of the gRNA-containing ~80S  
408 packaging initiation complex and ~500S intermediates. These data confirmed that a gRNA-binding  
409 domain is required to target Gag to the subset of granules containing gRNA.

410

#### 411 ***In situ* studies confirm that assembling Gag colocalizes with the RNA granule proteins**

412 Next we asked whether we can confirm the presence of Gag in RNA granules in intact cells by  
413 visualizing sites where Gag colocalizes with DDX6 or ABCE1 using the proximity ligation assay (PLA).  
414 PLA produces fluorescent spots at sites where two proteins are within 40 nm of each other *in situ*.  
415 Briefly, this method uses antibodies conjugated to complementary oligonucleotide probes to detect two



416 proteins of interest; the probes anneal only when within the 40 nm range, leading to a rolling circle  
417 amplification product that is recognized by a fluorophore-conjugated oligonucleotide [37](Fig 6A). If  
418 assembling Gag enters RNA granules containing ABCE1 and DDX6 as indicated by our biochemical  
419 studies, then the assembling Gag constructs (WT Gag, G2A Gag, and GagZip) should produce abundant  
420 Gag-DDX6 and Gag-ABCE1 PLA spots relative to assembly-incompetent MACA Gag, which fails to  
421 enter granules (Fig 3A-C) and does not coIP with DDX6 or ABCE1 [11,25]. To test this, 293T cells were  
422 transfected with WT vs. mutant provirus (Fig 1A, Set I) and analyzed for Gag-DDX6 or Gag-ABCE1  
423 colocalization by PLA. Concurrent Gag IF (Fig 6A) allowed us to confirm that the majority of PLA spots  
424 were observed in Gag-expressing cells, and to choose fields for quantitation with comparable Gag levels.  
425 For cells expressing WT Gag, G2A Gag, or GagZip, quantified fields contained ~50 Gag-DDX6 PLA  
426 spots per cell (Fig 6 B, C), three-fold more than for cells expressing MACA. Similar results were  
427 observed for Gag-ABCE1 PLA spots (Fig 7). Some PLA background was expected in cells transfected  
428 with MACA provirus, given that DDX6 and ABCE1, like MACA (Fig 3B), are found in the ~10S fraction  
429 and could therefore be in proximity outside of granules. Thus, PLA appears to identify DDX6- and  
430 ABCE1-containing RNA granules co-opted by Gag. Moreover, PLA confirms our biochemical studies in  
431 which we showed that WT Gag, G2A Gag, and GagZip target to ABCE1- and DDX6-containing RNA  
432 granules (Fig 3 - 5), as well as previous quantitative immunoelectron microscopy studies showing the  
433 colocalization of ABCE1 and DDX6 with assembling Gag [11,25,30,33].

434

#### 435 **Sites of Gag-DDX6 and Gag-ABCE1 interaction *in situ* are far more numerous than P bodies**

436 While DDX6 is a marker of P bodies, as shown by intense labeling of P bodies by DDX6 IF [31],  
437 DDX6 is also found in smaller RNA granules [11]. Given that cells typically contain fewer than ten P  
438 bodies [38], our finding that each Z stack image contains ~50 Gag-DDX6 PLA spots (Fig 6) suggested  
439 that granules containing Gag and DDX6 are far more numerous than P bodies. To test this possibility  
440 directly, we analyzed 293T cells for G2A Gag-DDX6 PLA spots with concurrent DDX6 IF, to allow  
441 detection of PLA spots and P bodies in the same fields (Fig 8A). G2A provirus was used here because

442 G2A Gag is arrested as the DDX6-containing ~80S packaging initiation complex (Fig 3B, C, F,); thus,  
443 most G2A Gag-DDX6 PLA spots likely represent packaging initiation complexes. Each Z stack image  
444 from G2A-expressing cells displayed an average of 56 Gag-DDX6 PLA spots, but only one P body by  
445 DDX6 IF (Fig 8B, C). Thus, packaging initiation complexes are far more numerous than P bodies.  
446 Interestingly, DDX6 IF with high gain revealed a diffuse, low-intensity, granular DDX6 signal (Fig 8C  
447 insets), in addition to the bright DDX6 positive P body foci, in both G2A-expressing and mock cells. The  
448 low-intensity DDX6 signal could correspond to DDX6-containing ~80S RNA granules, some of which  
449 are co-opted to form packaging initiation complexes.

450

#### 451 **Association of gRNA with DDX6 at the PM *in situ* upon expression of WT Gag but not GagZip**

452 Our biochemical studies showed that WT Gag remains associated with the co-opted RNA granule  
453 during late stages of assembly (Fig4), suggesting that assembling Gag takes the co-opted gRNA-  
454 containing granule to PM sites of budding and assembly. In contrast, we found that GagZip associates  
455 with RNA granule proteins at late stages of assembly, but not with the subset of RNA granules that  
456 contains gRNA (Fig 5). Thus, we would expect *in situ* approaches to reveal DDX6-containing RNA  
457 granules to be present at WT Gag or GagZip PM sites of assembly; however, the granules co-opted by  
458 WT Gag should also contain gRNA, while the granules co-opted by GagZip should contain DDX6 but no  
459 gRNA. Previously, we used quantitative immunoelectron microscopy (IEM) to demonstrate that RNA  
460 granule proteins (ABCE1 and/or DDX6) are recruited to PM sites of WT Gag and GagZip assembly  
461 [11,22,33]; however, these studies did not assess whether gRNA was associated with these granules.  
462 Here we used quantitative IEM with double labeling for gRNA and DDX6 to ask whether gRNA is  
463 associated with RNA granules at PM sites of assembly for WT Gag vs. GagZip *in situ* (Fig 9). HeLa cells  
464 stably expressing MCP fused to GFP (HeLa-MCP-GFP cells) were transfected with V1B genomic  
465 constructs encoding MS2 binding sites and Gag *in cis* (Fig 9A; Fig 1A, Set IV constructs; phenotypes  
466 confirmed in Fig S1B). Sections were labeled with  $\alpha$ DDX6 (large gold) to mark RNA granules, and with  
467  $\alpha$ GFP to mark MCP-GFP-tagged gRNAs (small gold). PM assembly sites, defined by the presence of

468 membrane deformation consistent with budding, were quantified and scored for gRNA labeling, DDX6  
469 labeling, and double labeling (Fig 9B, C; Table S1). When all sites of DDX6 labeling at PM assembly  
470 sites were quantified, similar high levels of DDX6 labeling were observed at both WT and GagZip PM  
471 assembly sites (56% vs. 40% of all WT vs. GagZip PM assembly sites displayed DDX6 labeling,  
472 respectively,  $p > 0.01$ ; shown as total DDX6+ in Fig 9B; shown as D+ tot in Table S1). Notably,  
473 quantitation of all sites of gRNA labeling at the PM revealed that gRNA was significantly more common  
474 at WT assembly sites relative to GagZip PM assembly sites (64% vs. 20% of all WT vs. GagZip PM  
475 assembly sites displayed gRNA labeling, respectively,  $p < 0.005$ ; shown as total gRNA+ in Fig 9B; shown  
476 as g+ Tot in Table S1). Our most striking results were obtained upon quantitation of PM assembly sites  
477 that were double labeled for DDX6 and gRNA. Abundant gRNA and DDX6 double labeling was  
478 observed at WT PM assembly sites, but not at GagZip PM assembly sites (33% vs. 5% of all WT vs.  
479 GagZip PM assembly sites, respectively, displayed double labeling,  $p < 0.005$ ; shown as gRNA+/DDX6+  
480 in Fig 9B; shown as g+D+ in Table S1). As expected, the assembly-incompetent MACA formed very  
481 few early or late PM assembly sites, unlike WT and GagZip. The same patterns were observed when  
482 early and late assembly sites were analyzed separately (Table S1). Thus, IEM analysis of PM assembly  
483 sites supports our conclusion that both WT and GagZip co-opt RNA granules during packaging and  
484 assembly, but only the RNA granules co-opted by WT Gag also contain gRNA. Moreover, these  
485 quantitative IEM studies (Fig 9) along with our PLA studies (Fig 6-8) provide *in situ* validation, in the  
486 absence of PuroHS treatment, of our biochemical studies.

487

## 488 **Discussion:**

489 It is increasingly evident that, within cells, the fate of an RNA is determined in large part by its  
490 associated cellular proteins [39]. For this reason, it will be important to determine whether HIV-1  
491 packaging initiation occurs in the context of cellular RNA binding proteins. Here we showed that almost  
492 all of the non-nuclear, non-translating gRNAs in HIV-1 expressing cells are found in large RNPCs  
493 (>30S). Moreover, a subclass of these RNPCs, identified as ~80S host RNA granules, is co-opted to

494 form the packaging initiation complex. We identified this ~80S host RNA granule as the packaging  
495 initiation complex by demonstrating that it is the only gRNA-containing complex formed by the G2A  
496 Gag mutant, which arrests at packaging initiation (Fig 3C). We also demonstrated that the RNA-granule-  
497 derived ~80S packaging initiation complex contains the host enzymes ABCE1 and DDX6, and is found in  
498 HIV-1-infected human T cells. Additionally, our studies revealed that Gag does not require a gRNA-  
499 binding domain to stably associate with ~80S host RNA granules, but does require a gRNA-binding  
500 domain to stably associate with the subset of these granules that contains gRNA. Finally, we showed that  
501 packaging initiation complexes are far more numerous than P bodies *in situ*; thus, packaging initiation  
502 complexes are not equivalent to P bodies, consistent with our finding that packaging initiation complexes  
503 correspond to smaller ~80S RNA granules.

504         Based on our findings, we propose the following model for initiation of gRNA packaging (Fig  
505 10). In the cytoplasm, gRNA is either in translating complexes or in non-translating host RNPCs of  
506 ~30S-80S. WT Gag uses a two-step mechanism to co-opt gRNA-containing granules to form the ~80S  
507 packaging initiation complex. One of these two steps involves an event that is independent of gRNA  
508 binding, and localizes WT Gag to a broad class of ABCE1- and DDX6-containing ~80S RNA granules.  
509 The second step involves a gRNA-binding-dependent event that localizes WT Gag to the subset of these  
510 granules that contains gRNA. In the case of WT Gag, targeting, packaging, and late stages of  
511 multimerization continue in association with this RNA granule, leading to formation of the ~500S  
512 packaging/assembly intermediate and the ~750S completely assembled capsid, both of which contain  
513 gRNA. The packaging initiation complex and the ~500S packaging/assembly intermediate contain  
514 ABCE1 and DDX6, two host enzymes that facilitate virus assembly [11,14] and that may distinguish this  
515 subclass of granules. In contrast, the intracellular ~750S completed capsid has dissociated from the RNA  
516 granule [11,14,32,33] and subsequently completes budding and release. Three caveats to this model  
517 should be noted. First, how gRNA enters the host RNA granules is not known. Most likely, gRNA-  
518 containing RNPCs are generated during transcription and undergo successive rounds of remodeling  
519 during nuclear export and in the cytoplasm to form ~80S non-translating RNA granules and translating

520 complexes in the cytoplasm. Secondly, while we refer to complexes in the ~80S region as a single ~80S  
521 complex for simplicity, future studies will be required to determine if complexes in this region are  
522 homogenous or display some heterogeneity. Thirdly, while our coIP studies demonstrate that Gag is  
523 associated with gRNA in the packaging intermediates, we do not know whether Gag and gRNA make  
524 direct contact with each other in these complexes. Based on studies by others [40], we speculate that Gag  
525 proteins make direct contact with only a few regions of gRNA in the ~80S packaging initiation complex,  
526 but contact many more regions of the gRNA in the ~500S late packaging intermediate.

527         A stunning finding of this study is that the packaging initiation complex has an S value similar to  
528 the eukaryotic ribosome, a large RNPC containing four RNAs and 79 cellular proteins. Interestingly,  
529 studies by others are consistent with this finding. Specifically, the reported diffusion coefficient of ~70S  
530 bacterial ribosomes ( $0.04 \mu\text{m}^2 \text{sec}^{-1}$ ; [41]) is similar to the ~0.07 and 0.014 to  $\mu\text{m}^2 \text{sec}^{-1}$  diffusion  
531 coefficients reported for cellular subpopulations of HIV-1 gRNA [9] and Gag [10], respectively. Our  
532 finding that the packaging initiation complex is ~80S suggests that this complex contains numerous  
533 additional components, since Gag is likely a dimer or small oligomer at this stage [7], and a Gag dimer on  
534 its own would be ~5S. Previously we showed that two other viral proteins are present in assembly  
535 intermediates – HIV-1 GagPol [33] and Vif [14]; however, it is likely that host components account for  
536 much of the molecular mass of the ~80S packaging initiation complex. Here we showed that the  
537 packaging initiation complex contains at least two host enzymes that are known to facilitate HIV-1 capsid  
538 assembly, ABCE1 and DDX6 [11,14]. In addition, our earlier studies demonstrated that the RNA granule  
539 proteins AGO2 and DCP2 are also present in these RNA-granule-derived assembly/packaging  
540 intermediates [11]. Further studies will be required to define the exact proteome and RNAome of the  
541 ~80S packaging initiation complex and determine whether this complex contains other RNA binding  
542 proteins such as Staufen1, which plays a role in HIV-1 packaging and assembly [42-44], and MOV10,  
543 which is packaged by HIV-1 and modulates virus infectivity [45,46].

544         Importantly, using PLA we showed that although the packaging initiation complex contains the P  
545 body marker DDX6, it is not equivalent to a P body, and corresponds instead to granules that are much

546 smaller than P bodies (Fig 8). The PLA findings correspond well with our biochemical findings, which  
547 suggest that the ~80S granule should be similar in size to the ~80S ribosome, which is ~25 nm in  
548 diameter [47]; thus the DDX6-containing ~80S granule should be four to twelve times smaller than  
549 DDX6-containing P bodies, which range from 100 – 300 nm in size [48]. These findings are also  
550 consistent with an earlier study showing that Gag and gRNA are not found in P bodies [49]. Note,  
551 however, that the co-opted ~80S RNA granules could represent P body subunits or could exchange with P  
552 bodies. Thus, we cannot rule out the possibility that the packaging initiation complex is occasionally  
553 found in P bodies, perhaps explaining an earlier report [50]. Future studies will need to compare the  
554 components of P bodies with those of the ~80S RNA granule that contains the vast majority of the gRNA  
555 in HIV-1 infected cells. However, it is worth noting that in the case of the Ty3 yeast retrotransposon,  
556 which is distantly related to HIV-1, assembling Ty3 Gag and its packaged Ty3 RNA are found in large  
557 clusters that contain the yeast DDX6 homologue dhh1 [51,52]; moreover knockdown and mutational  
558 analyses indicate a role for RNA granule proteins in formation of functional Ty3 particles in yeast  
559 [53,54]. Similarly, we had previously shown using siRNA knockdown that DDX6 promotes immature  
560 HIV-1 capsid assembly, and can be rescued by a siRNA resistant WT DDX6 but not a ATPase-defective  
561 DDX6 mutant [11]. While others have not observed that DDX6 is required for HIV-1 capsid assembly  
562 [49], this could be because other helicases in the co-opted RNA granule can substitute for DDX6 in some  
563 cell types or when given enough time to undergo upregulation.

564 Our identification of the two-step mechanism for stable association of Gag with gRNA-  
565 containing ~80S granules resulted from the observation that an assembling Gag that lacks a gRNA-  
566 binding domain (GagZip) targets to RNA granules that lack gRNA, but can be redirected to gRNA-  
567 containing granules by addition of a heterologous gRNA-binding domain (Fig 5C, F; [11,22]). Thus, it  
568 appears that most ~80S RNA granules contain cellular RNAs, with only a small subset containing gRNA.  
569 Notably, a key difference between MACA, which fails to enter RNA granules, and GagZip, which enters  
570 ABCE1- and DDX6-containing granules that lack gRNA, is that GagZip has a heterologous  
571 oligomerization domain (LZ) that substitutes for NC, a domain in WT Gag that mediates oligomerization.

572 Together, these data argue that two events are required for stable association of Gag with gRNA-  
573 containing granules, with one being the aforementioned poorly understood, NC-independent step in  
574 which oligomerization-competent Gag targets to a large class of ~80S ABCE1- and DDX6-containing  
575 RNA granules, most of which lack gRNA; and the other being a gRNA-binding step, dependent on NC or  
576 a heterologous gRNA-binding domain, that enables stable association with a gRNA-containing subset of  
577 these granules.

578 Our finding that, in WT Gag, the NC domain is required for packaging initiation complex  
579 formation fits with decades of studies showing the importance of NC in packaging. At the same time, our  
580 data argue for a new view of packaging. To date, packaging studies have not specified where or how Gag  
581 associates with gRNA; we fill this gap by providing evidence that packaging is initiated within a unique  
582 host RNPC that contains RNA granule markers and nearly all the packageable gRNA. Interestingly,  
583 sequestration of gRNA within unique host RNA granules could be both beneficial and problematic for  
584 the virus. On the one hand, gRNA sequestration is likely to be highly advantageous to the virus - it could  
585 allow gRNA to evade detection by the host immune system, create a site where assembling Gag can be  
586 concentrated, and provide Gag access to RNA helicases that could facilitate displacement of host RNA  
587 binding proteins from gRNA allowing them to be replaced with Gag. On the other hand gRNA  
588 sequestration creates a dilemma for the virus in that it puts gRNA in a different subcellular compartment  
589 (the RNA granule) than newly translated Gag, which is found either associated with translating ribosomes  
590 or in the soluble compartment. To solve this problem, Gag appears to have evolved a mechanism for  
591 localizing to a subclass of mRNA-containing host RNA granules, which in turn allows efficient NC-  
592 dependent localization to the small subset of these granules that contains gRNA. Future studies will need  
593 to further test this model and address how both the cell and the virus utilize this unique class of RNA  
594 granules.

595

596

597

598 **Materials and Methods:**

599 **Plasmids and cells**

600 Four types of expression systems were utilized in this study. Proviruses (Set I in Fig 1A) are  
601 from the LAI strain and were described previously [22,33,55]. These have native HIV-1 sequences and  
602 the HIV-1 LTRs. Proviruses were transfected into COS-1 or 293T cells (both obtained from the  
603 American Type Culture Collection (ATCC), Manassas, VA) as indicated for some biochemical studies  
604 and all PLA studies. For other biochemical studies, we used an *in trans* expression system in which the  
605 genome is provided by V1B, a modified proviral plasmid that expresses an RNA encoding an assembly-  
606 incompetent truncated *gag* gene, all cis-acting packaging signals, full-length *tat*, *rev*, and *vpu* genes, and  
607 24 MS2 stem loops that bind to MCP [8]. V1B was transfected into COS-1 or 293T cells with WT and  
608 mutant SynGagGFP constructs (here referred to as GagGFP constructs) provided *in trans*, where  
609 indicated. V1B and the codon optimized SynGagGFP WT and G2A constructs (Set II in Fig 1A) were  
610 provided by P. Bieniasz (Rockefeller University, New York, N.Y.) and were utilized in previous live  
611 imaging studies [8] and coIP studies [7]. Additional GagGFP constructs (MACA and GagZip) were  
612 generated from the WT SynGagGFP construct. For G2A, the glycine in position 2 of Gag was converted  
613 to an alanine by via site-directed mutagenesis, as described previously [33]; for GagZip, a leucine zipper  
614 was inserted in place of nucleocapsid using Gibson assembly, as described previously [22]. For IEM  
615 experiments, HeLa cells that express MCP-NLS-GFP as described previously [8] were obtained from P.  
616 Bieniasz (Rockefeller University, New York, N.Y.). To ensure that all HeLa-MCP-GFP cells expressed  
617 both Gag and genome following transfection, V1B constructs expressing WT and mutant Gag *in cis* were  
618 generated by inserting relevant Gag coding regions from HIV-1 proviruses (Set I in Fig 1A) into V1B  
619 constructs containing MS2 binding sites via Gibson assembly to generate Set IV constructs in Fig 1A.  
620 Oligos used for site-directed mutagenesis and Gibson assemblies are available upon request.

621 H9 cells (ATCC) were used to generate H9-HIVpro- cells (Set III in Fig 1A) by infection with  
622 virus. Plasmid used for virus production was generated by inserting three protease inactivation mutations  
623 into a previously described HIV-1 provirus, LAI strain, that encodes deletions in *env* and *vif*, a frameshift



624 in *vpr*, and substitution of *nef* with a puromycin resistance gene, as described previously [11]. 293T cells  
625 were transfected with this plasmid to produce virus, and H9 cells were infected with this virus and  
626 maintained under puromycin selection as described previously [32].

627 COS-1 and 293T cells were maintained in DMEM (Life Technologies) with 10% FBS. H9 cells  
628 were maintained in RPMI (Life Technologies) with 10% FBS under puromycin selection. HeLa-MCP-  
629 GFP cells were obtained from P. Bieniasz and were maintained in DMEM with 10% FBS, and  
630 periodically subjected to blastocidin selection.

631

### 632 **Transfection, IP, and WB**

633 COS-1, 293T, or HeLa-MCP-GFP cells were transfected with 1-5 $\mu$ g DNA using  
634 polyethylenimine (Polysciences, Warrington, PA). Cell lysates were harvested in 1X Mg<sup>+2</sup>-containing  
635 NP40 buffer (10 mM Tris-HCl, pH 7.9, 100 mM NaCl, 50 mM KCl, 1 mM MgCl, 0.625% NP40) in the  
636 presence of freshly prepared protease inhibitor cocktail (Sigma, St Louis, MO) and RNaseOUT  
637 (Invitrogen). Where indicated, lysates were treated with 1 mM puromycin HCl (Invitrogen) for 10 min at  
638 26°C followed by 0.5M KCl for 10 min at 26 °C. Lysates were analyzed by WB or RT-qPCR, or  
639 subjected to IP as described below. Alternatively, lysates were analyzed by velocity sedimentation, as  
640 described below, and gradient fractions were then analyzed by WB, RT-qPCR, or IP.

641 Except where indicated, lysates or gradient fractions were subjected to IP with affinity purified  
642 antibody to ABCE1 [14], HIV immunoglobulin NIH AIDS Reagents Catalog #3957, from NABI and  
643 NHLBI), a monoclonal to GFP (Roche), or an antibody to DDX6 (#461, Bethyl Laboratories,  
644 Montgomery, TX), using protein G-coupled Dynabeads (Life Technologies). IP eluates were analyzed by  
645 SDS-PAGE, followed by western blot (WB) using the primary antibodies described above or a  
646 monoclonal antibody directed against HIV-1 Gag p24 (HIV-1 hybridoma 183-H12-5C obtained from  
647 Bruce Chesebro through the AIDS Reagent Program Division of AIDS, NIAID, NIH), followed by an  
648 HRP-conjugated anti-human IgG secondary antibody (Bethyl Laboratories, Montgomery, TX), or an  
649 HRP-conjugated anti-mouse-IgG<sub>1</sub> (Bethyl Laboratories) or anti-mouse-IgG or anti-rabbit secondary

650 antibody (Santa Cruz Biotechnology, Dallas, TX). In Suppl. Fig 3A, IPs were subjected to WB with HIV  
651 immune globulin (provided by NABI and NHLBI, catalog no. 3957 in the AIDS Reagent Program  
652 Division of AIDS, NIAID, NIH) for detection of Gag. WB signals from IP eluates were detected using  
653 Pierce ECL substrate (Thermo Fisher Scientific) with Carestream Kodak Biomax Light film. For  
654 detection of Gag in total cell lysates, velocity sedimentation fractions, and membrane flotation fractions,  
655 WBs were performed as described above, or using antibodies conjugated to infrared dyes (LI-COR  
656 Biosciences, Lincoln, NE). Quantification of Gag bands on film was performed using Image J software  
657 or LI-COR Odyssey software.

658

### 659 **RNA quantification**

660 Transfected cells or VLPs were harvested as described above. Where indicated lysates were analyzed by  
661 velocity sedimentation and or IP, as described above except that IPs for gRNA quantification were  
662 washed four times in detergent buffer and once in non-detergent buffer. For total cell lysate analysis,  
663 aliquots corresponding to  $\sim 5 \times 10^3$  COS-1 cells,  $2 \times 10^4$  293T cells and  $8.5 \times 10^3$  HeLa-MCP-GFP cells  
664 were used. For VLP analysis, aliquots corresponding to VLPs from  $1 \times 10^5$  293T cells and  $1.5 \times 10^4$  HeLa-  
665 MCP-GFP cells were used. For gradient analysis,  $\sim 4 \times 10^5$  COS-1 cells,  $2 \times 10^6$  203T cells, or  $6 \times 10^5$  H9  
666 cells were analyzed on a single 5 ml gradient. Aliquots of gradient fractions or gradient IP fractions were  
667 treated with proteinase K (Sigma) at a final concentration of 150  $\mu\text{g/ml}$  in 0.1% SDS, followed by total  
668 RNA extraction by using Trizol (Ambion). RNA was precipitated with isopropanol, extracted with BCP  
669 (Molecular Research Center), pelleted at 12,000xg for 15 min at 4°C, and the RNA pellet was subjected  
670 to DNase I (Invitrogen) treatment (2 u per 50 ul reaction). The iScript Advanced cDNA synthesis kit  
671 (Bio-Rad) was used to generate cDNA from 10% of the RNA using random hexamer primers at 42°C for  
672 30 min, followed by heat inactivation. An aliquot of cDNA (2.9%) was used for qPCR using SYBR  
673 Green (Bio-Rad) to determine RNA copy number. For HIV-1 gRNA qPCR, we used the following oligos  
674 that target bp 162 to 269 within the Gag open reading frame in HIV-1 LAI (at the end of MA and start of  
675 CA) and result in a 108 bp amplicon: 5'-AGAAGGCTGTAGACAAATACTGGG-3' (forward); 5'-

676 TGATGCACACAATAGAGGGTTG-3' (reverse). These oligos detect the full length HIV-1 provirus as  
677 well as the V1B genomic construct, but do not recognize the GagGFP constructs that were transfected *in*  
678 *trans*, as expected since the GagGFP constructs were codon-optimized. To determine the copy number of  
679 other RNAs, we used the following qPCR oligos: Tat mRNA, 5'-TCT ATC AAA GCA ACC CAC CTC-  
680 3' (forward) and 5'-CGT CCC AGA TAA GTG CTA AGG-3' (reverse); 28S rRNA, 5'-CCC AGT GCT  
681 CTG AAT GTC AA-3' (forward) and 5'-AGT GGG AAT CTC GTT CAT CC-3' (reverse); GAPDH  
682 mRNA, 5'-AGG TCA TCC CTG AGC TGA AC-3' (forward) and 5'-GCA ATG CCA GCC CCA GCG  
683 TC-3' (reverse); and 7SL RNA 5'-GCT ATG CCG ATC GGG TGT CCG-3' (forward) and 5'-TGC AGT  
684 GGC TAT TCA CAG GCG-3'(reverse). All qPCR samples were analyzed in duplicate using the MyiQ  
685 RT-PCR detection system and iQ5 software (Bio-Rad). Amplicons corresponding to region amplified by  
686 qPCR were used to generate standard curves. Duplicate nine-point standard curves were included on  
687 every qPCR plate, ranging from 10<sup>1</sup> copies to 10<sup>8</sup> copies, with a typical efficiency of ~90% or greater and  
688 an R<sup>2</sup> of 0.99. Standard curves were able to detect 10 copies per reaction but not 1 copy, thereby setting  
689 the detection threshold at 10 copies per reaction, which was equivalent to ~1000 copies per 1000 cells for  
690 inputs and total gRNA from gradient fractions, ~100 copies per 1000 cells for IPs from total cell lysates  
691 or gradient fractions, and ~50 copies per 1000 cells for VLPs. Minus RNA controls were included in  
692 each experiment and were always zero. RT minus controls were also included in each experiment and  
693 ranged from 0 - 100 copies per reaction. Mock transfected VLP controls were used to set the baseline in  
694 graphs and ranged from 1 - 1000 copies per 1000 cells. For IPs, nonimmune gRNA copy number was  
695 analyzed in parallel and was typically 1-2 logs lower than IPs.

696 Quantification of the total cell number used in each experiment allowed us to represent all qPCR  
697 data as number of gRNA copies per 1000 cells, except for Fig 2 data which is presented as % of total  
698 gRNA to allow comparison across different RNAs. Log scales were used to display all VLP, which  
699 exhibit large differences. Linear scales were used for IP data, which exhibit smaller differences. Note  
700 that differences in transfection efficiency resulted in a range of total gRNA copies per 1000 cells between  
701 experiments; likewise, IP efficiency also varied between experiments. Thus the exact number of gRNA

702 copies immunoprecipitated in fractions from different experiments varied considerably, but the pattern  
703 did not.

704

### 705 **Analysis of VLP production**

706 Supernatants of COS-1 or HeLa-MCP-GFP cells, transfected as described above, were centrifuged at  
707 2000 rpm (910 x g) for 10 min at 4°C, filtered (0.45 µm) to remove remaining cells, and purified through  
708 a 30% sucrose cushion in an SW60Ti rotor at 60,000 rpm (370,000 x g) for 30 min at 4°C, as described  
709 previously [22].

710

### 711 **Velocity Sedimentation**

712 Transfected COS-1 cells or 293T cells were harvested at 36 h or 15 h post-transfection,  
713 respectively, as described above and diluted into 1X NP40 buffer (10 mM Tris acetate pH 7.4, 50 mM  
714 KCl, 100 mM NaCl, 0.625% NP-40). For each sample, 120 µl lysate was layered on a step gradient. To  
715 resolve complexes of ~10S to ~150S (Fig 2, 3), step gradients were prepared from 5%, 10% 15%, 20%,  
716 25%, and 30% sucrose in NP40 buffer without MgCl (10 mM Tris-HCl, pH 7.9, 100 mM NaCl, 50 mM  
717 KCl, 0.625% NP40) and subjected to velocity sedimentation in a 5 ml Beckman MLS50 rotor at 45,000  
718 rpm (162,500 x g) for 90 min at 4°C. To resolve from ~10S to ~750S, step gradients were prepared from  
719 10%, 15%, 40%, 50%, 60%, 70%, and 80% sucrose in NP40 buffer without MgCl, and subjected to  
720 velocity sedimentation in a 5 ml Beckman MLS50 rotor at 45,000 rpm (162,500 x g), for 45 min at 4°C.  
721 Gradients were fractionated from top to bottom, and aliquots were analyzed by WB, IP, and/or RT-qPCR as  
722 described above. S values were determined, using a published equation[56] and S value markers, as  
723 described previously [34].

724

### 725 **Proximity Ligation Assay**

726 293T cells were plated into 6-well dishes containing coverslips with Grace Biolabs CultureWell  
727 silicone chambers (Sigma-Aldrich) attached to create four chambers on each coverslip. Cells were

728 transfected with 3  $\mu$ g of plasmid per well and 16.5 hours later were fixed for 15 minutes in 4%  
729 paraformaldehyde in PBS pH 7.4, permeabilized in 0.5% saponin in PBS, pH 7.4 for 10 minutes, and  
730 blocked in Duolink blocking solution (Sigma-Aldrich) at 37°C for 30 min. Cells were incubated in  
731 primary antibody (described under IP methods above), followed by Duolink reagents (Sigma-Aldrich):  
732 oligo-linked secondary antibody, ligation mix, and red or green amplification/detection mix, with washes  
733 in between, as per the Duolink protocol. For concurrent IF, cells were incubated for 15 minutes at RT  
734 with 1:1000 Alexafluor 594 anti-mouse or Alexafluor 488 anti-rabbit secondary antibody following the  
735 final PLA washes. Cover slips were mounted using Duolink In Situ Mounting Media with DAPI, sealed  
736 to the glass slides with clear nail polish, allowed to dry for 24 h at RT, and stored at -20°C. Imaging was  
737 performed with a Zeiss Axiovert 200M deconvolution microscope using Zeiss Plan-Apochromat 63X/  
738 aperture 1.4 objective with oil immersion, with AxioVision Rel. 4.8 software. For quantification, five  
739 fields containing at least three IF or PLA positive cells were chosen at random and imaged using identical  
740 exposure times for the red and green channels (red/green exposures were 1 second/1.5 seconds for Figure  
741 6, 2 seconds/1 second for Figure 7, and 40 milliseconds/250 milliseconds for Figure 8). Images were  
742 captured as ten 1- $\mu$ m Z-stacks centered on the focal point for the PLA. Images were deconvolved using  
743 the AxioVision software, then exported as .tif files, and Image J was used to outline Gag-positive cells in  
744 each field. Within those positive cells, the central Z-stack image was used to count PLA “spots”, and  
745 quantify IF intensity where indicated, using Image J. PLA spot number for each field was then  
746 normalized to the average IF intensity within that field, and the results were plotted with error bars  
747 representing the SEM for five fields. For Figure 8, Gag-DDX6 PLA was done with either Gag IF or  
748 DDX6 IF, and the PLA paired with Gag IF was used for PLA spot quantitation to exclude background  
749 spots in Gag-negative cells, whereas the PLA paired with DDX6 IF was used for P body  
750 quantitation. For the sample field images used in each figure, after imaging, the red channel gain was  
751 increased proportionally (to 3 in Figure 6, to 11 in Figure 7, and to 7 in Figure 8) in the AxioVision Rel.  
752 4.8 software for all conditions, to allow better display of red spots in final figures. The same was done for  
753 the green channel gain (increased to 7) to display smaller DDX6 granules in the Fig 8D insets. Images

754 were imported in 8-bit color into Adobe Illustrator to create the final figure layout, without further  
755 adjustments to color balance or gamma correction.

756

## 757 **Quantitative IEM**

758 HeLa-MCP-GFP cells were transfected with the indicated constructs. Cells were harvested at 24  
759 h post-transfection in fixative (3% paraformaldehyde, 0.025% glutaraldehyde in 0.1 M phosphate buffer,  
760 pH 7.4), pelleted, and subjected to high pressure freezing using the Leica EMPACT2, followed by freeze  
761 substitution. Samples were infiltrated overnight with LR White embedding resin (London Resin  
762 Company Ltd, Reading, Berkshire, England) in ethanol, changed to straight LR White, embedded in  
763 gelatin capsules (Electron Microscopy Sciences (EMS), Hatfield, PA, USA), and cured overnight in a UV  
764 light cryo-chamber at 4° C. Sections (~50 nm) were placed on grids, treated with 0.05 M glycine for 20  
765 min at RT, rinsed in PBS, blocked for 45 min with 1% bovine serum albumin (EMS), and washed in PBS  
766 with 0.1% bovine serum albumin-C (BSA-C) (EMS). For immunogold double-labeling, a previously  
767 described peptide-specific antiserum directed against DDX6 was affinity purified, desalted, and  
768 concentrated [11]. Grids were blocked in 0.5% BSA-C, then incubated with primary antibody to DDX6  
769 (0.1 mg/ml in 0.5% BSA-C), followed by goat a-rabbit F(ab')<sub>2</sub> fragment secondary antibody conjugated  
770 to 15nm gold particles (EMS), with washes after each step. Grids were then labeled with the second  
771 primary, mouse antibody to GFP (Roche) at 0.2 mg/ml in 0.1% BSAC with 0.002% Tween, followed by  
772 goat a-mouse F(ab')<sub>2</sub> fragment conjugated to 6 nm gold particles (EMS). Fixation, negative staining,  
773 imaging with the JEOL-1400 transmission electron microscope, and image acquisition have been  
774 described previously [11].

775 For quantification, images were acquired for ten cells from each of the three groups, with the goal  
776 being to analyze similar total PM lengths in each group. Cells were chosen randomly, but excluded for  
777 the WT and GagZip groups if they had fewer than ten particles at the PM visible at low power. Images  
778 encompassed the area of each cell that contained PM assembly sites, with images obtained for ~250 μm  
779 of PM total per group. The number of assembly sites analyzed within this ~250 μm of PM are not

780 equivalent since the number of assembly sites depends on VLP phenotype and kinetics. A total of 760  
781 WT events and 409 GagZip events were analyzed, but are shown as number of sites per 25  $\mu\text{m}$  PM per  
782 cell in Table 1. Each PM assembly site was scored as genome positive (g+), DDX6+ (D+), or double-  
783 labeled (g+D+). The following definitions were used for image analysis: early PM assembly sites were  
784 defined as displaying curvature at the membrane but with < 50% of a complete bud; late assembly sites”  
785 at the PM were defined as displaying curvature but with  $\geq$  50% of a complete bud. If early or late sites  
786 contained two or more small gold particles within the full circle defined by the bud, they were scored as  
787 g+. If these sites contained one or more large gold particles within a 150 nm perimeter outside the full  
788 circle defined by the bud (roughly the size of an RNA granule plus space to account for the antibodies and  
789 gold particle bound to an antigen at the periphery of such a granule), then they were scored as D+. Table  
790 1 shows the average number of early, late, and early+late PM assembly events per 25  $\mu\text{m}$  of PM per cell  
791 (n=10 cells +/- SEM), along with the breakdown of how many of these events were g+ (total vs. single-  
792 labeled), D+ (total vs. single-labeled), or g+D+ (double-labeled). In italics are g+, D+, and g+D+ per 25  
793  $\mu\text{m}$  of PM per cell as a percentage of the total for each group. Significance was determined on percentage  
794 data using a two tailed t-test; not significant was defined as  $p > 0.01$ . Labeling of early+late events as a  
795 percent of total early+late events is also shown in graphical form in Fig 8B. As described previously  
796 [22], the sensitivity of IEM for capturing colocalization is limited by a number of factors including the  
797 fact that the 50 nm sections only capture  $\leq$  50% of a single capsid, which has a diameter of ~100-150 nm.

798

799

800

801

802

803

804

805

806 **Acknowledgments:**

807 We thank B. Schneider, S. MacFarlane, S. Knecht, and the Fred Hutchinson Cancer Research  
808 Center Electron Microscopy Resource for assistance with IEM; and C. Geary and C. W. Peterson for  
809 assistance with generating reagents. We thank P. Bieniasz for V1B, SynGag, and MS2 coat protein  
810 plasmids, and for the HeLa-MCP-GFP cell line. The following reagents were obtained from the NIH  
811 AIDS Reagent Program, Division of AIDS, NIAID, NIH: catalog no. 1513 HIV-1 Gag p24 hybridoma  
812 (183-H12-5C) obtained from B. Chesebro; and catalog no. 3957 HIV Ig from NABI and NHLBI. We  
813 thank M. Emerman, A. Sharma, N. Westergreen, D. Ressler, and V. Swain for comments on the  
814 manuscript.

815

816

817

818

819

820

821

822

823

824

825

826

827

828

829

830

831



832 **References:**

- 833 1. Kuzembayeva M, Dilley K, Sardo L, Hu WS (2014) Life of psi: How full-length HIV-1 RNAs become  
834 packaged genomes in the viral particles. *Virology*.
- 835 2. Sundquist WI, Krausslich HG (2012) HIV-1 Assembly, Budding, and Maturation. *Cold Spring Harb*  
836 *Perspect Med* 2: pii: a015420.
- 837 3. Hellmund C, Lever AM (2016) Coordination of Genomic RNA Packaging with Viral Assembly in  
838 HIV-1. *Viruses* 8: pii: E192.
- 839 4. Keane SC, Summers MF (2016) NMR Studies of the Structure and Function of the HIV-1 5'-Leader.  
840 *Viruses* 8: pii: E338.
- 841 5. Kharytonchyk S, Monti S, Smaldino PJ, Van V, Bolden NC, et al. (2016) Transcriptional start site  
842 heterogeneity modulates the structure and function of the HIV-1 genome. *Proc Natl Acad Sci U S*  
843 *A* 113: 13378-13383.
- 844 6. Rulli SJ, Jr., Hibbert CS, Mirro J, Pederson T, Biswal S, et al. (2007) Selective and nonselective  
845 packaging of cellular RNAs in retrovirus particles. *J Virol* 81: 6623-6631.
- 846 7. Kutluay SB, Bieniasz PD (2010) Analysis of the initiating events in HIV-1 particle assembly and  
847 genome packaging. *PLoS Pathog* 6: e1001200.
- 848 8. Jouvenet N, Simon SM, Bieniasz PD (2009) Imaging the interaction of HIV-1 genomes and Gag during  
849 assembly of individual viral particles. *Proc Natl Acad Sci U S A* 106: 19114-19119.
- 850 9. Chen J, Grunwald D, Sardo L, Galli A, Plisov S, et al. (2014) Cytoplasmic HIV-1 RNA is mainly  
851 transported by diffusion in the presence or absence of Gag protein. *Proc Natl Acad Sci U S A*  
852 111: E5205-5213.
- 853 10. Hendrix J, Baumgartel V, Schrimpf W, Ivanchenko S, Digman MA, et al. (2015) Live-cell  
854 observation of cytosolic HIV-1 assembly onset reveals RNA-interacting Gag oligomers. *J Cell*  
855 *Biol* 210: 629-646.
- 856 11. Reed JC, Molter B, Geary CD, McNevin J, McElrath J, et al. (2012) HIV-1 Gag co-opts a cellular  
857 complex containing DDX6, a helicase that facilitates capsid assembly. *J Cell Biol* 198: 439-456.

- 858 12. Buchan JR (2014) mRNP granules. Assembly, function, and connections with disease. *RNA Biol* 11:  
859 1019-1030.
- 860 13. Lingappa JR, Reed JC, Tanaka M, Chutiraka K, Robinson BA (2014) How HIV-1 Gag assembles in  
861 cells: Putting together pieces of the puzzle. *Virus Res*.
- 862 14. Zimmerman C, Klein KC, Kiser PK, Singh ARS, Firestein BL, et al. (2002) Identification of a host  
863 protein essential for assembly of immature HIV-1 capsids. *Nature* 415: 88-92.
- 864 15. Berkowitz R, Fisher J, Goff SP (1996) RNA packaging. *Curr Top Microbiol Immunol* 214: 177-218.
- 865 16. Freed EO (1998) HIV-1 gag proteins: diverse functions in the virus life cycle. *Virology* 251: 1-15.
- 866 17. Bryant M, Ratner L (1990) Myristoylation-dependent replication and assembly of human  
867 immunodeficiency virus 1. *Proc Natl Acad Sci U S A* 87: 523-527.
- 868 18. Freed EO, Orenstein JM, Buckler-White AJ, Martin MA (1994) Single amino acid changes in the  
869 human immunodeficiency virus type 1 matrix protein block virus particle production. *J Virol* 68:  
870 5311-5320.
- 871 19. Gottlinger HG, Sodroski JG, Haseltine WA (1989) Role of capsid precursor processing and  
872 myristoylation in morphogenesis and infectivity of human immunodeficiency virus type 1. *Proc*  
873 *Natl Acad Sci U S A* 86: 5781-5785.
- 874 20. Accola MA, Strack B, Gottlinger HG (2000) Efficient particle production by minimal Gag constructs  
875 which retain the carboxy-terminal domain of human immunodeficiency virus type 1 capsid-p2  
876 and a late assembly domain. *J Virol* 74: 5395-5402.
- 877 21. Johnson MC, Scobie HM, Ma YM, Vogt VM (2002) Nucleic acid-independent retrovirus assembly  
878 can be driven by dimerization. *J Virol* 76: 11177-11185.
- 879 22. Klein KC, Reed JC, Tanaka M, Nguyen VT, Giri S, et al. (2011) HIV Gag-leucine zipper chimeras  
880 form ABCE1-containing intermediates and RNase-resistant immature capsids similar to those  
881 formed by wild-type HIV-1 Gag. *J Virol* 85: 7419-7435.
- 882 23. Zennou V, Perez-Caballero D, Gottlinger H, Bieniasz PD (2004) APOBEC3G incorporation into  
883 human immunodeficiency virus type 1 particles. *J Virol* 78: 12058-12061.

- 884 24. Zhang Y, Qian H, Love Z, Barklis E (1998) Analysis of the assembly function of the human  
885 immunodeficiency virus type 1 gag protein nucleocapsid domain. *J Virol* 72: 1782-1789.
- 886 25. Robinson BA, Reed JC, Geary CD, Swain JV, Lingappa JR (2014) A temporospatial map that defines  
887 specific steps at which critical surfaces in the Gag MA and CA domains act during immature  
888 HIV-1 capsid assembly in cells. *J Virol* 88: 5718-5741.
- 889 26. Blobel G (1971) Release, identification, and isolation of messenger RNA from mammalian  
890 ribosomes. *Proc Natl Acad Sci U S A* 68: 832-835.
- 891 27. Blobel G, Sabatini D (1971) Dissociation of mammalian polyribosomes into subunits by puromycin.  
892 *Proc Natl Acad Sci U S A* 68: 390-394.
- 893 28. Brengues M, Teixeira D, Parker R (2005) Movement of eukaryotic mRNAs between polysomes and  
894 cytoplasmic processing bodies. *Science* 310: 486-489.
- 895 29. Walter P, Blobel G (1980) Purification of a membrane-associated protein complex required for  
896 protein translocation across the endoplasmic reticulum. *Proc Natl Acad Sci U S A* 77: 7112-7116.
- 897 30. Tanaka M, Robinson BA, Chutiraka K, Geary CD, Reed JC, et al. (2015) Mutations of Conserved  
898 Residues in the Major Homology Region Arrest Assembling HIV-1 Gag as a Membrane-Targeted  
899 Intermediate Containing Genomic RNA and Cellular Proteins. *J Virol* 90: 1944-1963.
- 900 31. Kedersha N, Anderson P (2007) Mammalian stress granules and processing bodies. *Methods Enzymol*  
901 431: 61-81.
- 902 32. Doohar JE, Lingappa JR (2004) Conservation of a step-wise, energy-sensitive pathway involving  
903 HP68 for assembly of primate lentiviral capsids in cells. *J Virol* 78: 1645-1656.
- 904 33. Doohar JE, Schneider BL, Reed JC, Lingappa JR (2007) Host ABCE1 is at Plasma Membrane HIV  
905 Assembly Sites and Its Dissociation from Gag is Linked to Subsequent Events of Virus  
906 Production. *Traffic* 8: 195-211.
- 907 34. Lingappa JR, Hill RL, Wong ML, Hegde RS (1997) A multistep, ATP-dependent pathway for  
908 assembly of human immunodeficiency virus capsids in a cell-free system. *J Cell Biol* 136: 567-  
909 581.

- 910 35. Ono A, Waheed AA, Joshi A, Freed EO (2005) Association of human immunodeficiency virus type 1  
911 gag with membrane does not require highly basic sequences in the nucleocapsid: use of a novel  
912 Gag multimerization assay. *J Virol* 79: 14131-14140.
- 913 36. Keryer-Bibens C, Barreau C, Osborne HB (2008) Tethering of proteins to RNAs by bacteriophage  
914 proteins. *Biol Cell* 100: 125-138.
- 915 37. Soderberg O, Gullberg M, Jarvius M, Ridderstrale K, Leuchowius KJ, et al. (2006) Direct observation  
916 of individual endogenous protein complexes in situ by proximity ligation. *Nat Methods* 3: 995-  
917 1000.
- 918 38. Cougot N, Cavalier A, Thomas D, Gillet R (2012) The dual organization of P-bodies revealed by  
919 immunoelectron microscopy and electron tomography. *J Mol Biol* 420: 17-28.
- 920 39. Gehring NH, Wahle E, Fischer U (2017) Deciphering the mRNP Code: RNA-Bound Determinants of  
921 Post-Transcriptional Gene Regulation. *Trends Biochem Sci* 42: 369-382.
- 922 40. Kutluay SB, Zang T, Blanco-Melo D, Powell C, Jannain D, et al. (2014) Global changes in the RNA  
923 binding specificity of HIV-1 gag regulate virion genesis. *Cell* 159: 1096-1109.
- 924 41. Bakshi S, Siryaporn A, Goulian M, Weisshaar JC (2012) Superresolution imaging of ribosomes and  
925 RNA polymerase in live *Escherichia coli* cells. *Mol Microbiol* 85: 21-38.
- 926 42. Abrahamyan LG, Chatel-Chaix L, Ajamian L, Milev MP, Monette A, et al. (2010) Novel Staufen1  
927 ribonucleoproteins prevent formation of stress granules but favour encapsidation of HIV-1  
928 genomic RNA. *J Cell Sci* 123: 369-383.
- 929 43. Chatel-Chaix L, Boulay K, Mouland AJ, Desgroseillers L (2008) The host protein Staufen1 interacts  
930 with the Pr55Gag zinc fingers and regulates HIV-1 assembly via its N-terminus. *Retrovirology* 5:  
931 41.
- 932 44. Chatel-Chaix L, Clement JF, Martel C, Beriault V, Gagnon A, et al. (2004) Identification of Staufen  
933 in the human immunodeficiency virus type 1 Gag ribonucleoprotein complex and a role in  
934 generating infectious viral particles. *Mol Cell Biol* 24: 2637-2648.

- 935 45. Burdick R, Smith JL, Chaipan C, Friew Y, Chen J, et al. (2010) P body-associated protein Mov10  
936 inhibits HIV-1 replication at multiple stages. *Journal of virology* 84: 10241-10253.
- 937 46. Furtak V, Mulky A, Rawlings SA, Kozhaya L, Lee K, et al. (2010) Perturbation of the P-body  
938 component Mov10 inhibits HIV-1 infectivity. *PloS one* 5: e9081.
- 939 47. Verschoor A, Warner JR, Srivastava S, Grassucci RA, Frank J (1998) Three-dimensional structure of  
940 the yeast ribosome. *Nucleic Acids Res* 26: 655-661.
- 941 48. Eulalio A, Behm-Ansmant I, Izaurralde E (2007) P bodies: at the crossroads of post-transcriptional  
942 pathways. *Nat Rev Mol Cell Biol* 8: 9-22.
- 943 49. Phalora PK, Sherer NM, Wolinsky SM, Swanson CM, Malim MH (2012) HIV-1 replication and  
944 APOBEC3 antiviral activity are not regulated by P bodies. *J Virol* 86: 11712-11724.
- 945 50. Nathans R, Chu CY, Serquina AK, Lu CC, Cao H, et al. (2009) Cellular microRNA and P bodies  
946 modulate host-HIV-1 interactions. *Molecular cell* 34: 696-709.
- 947 51. Beliakova-Bethell N, Beckham C, Giddings TH, Jr., Winey M, Parker R, et al. (2006) Virus-like  
948 particles of the Ty3 retrotransposon assemble in association with P-body components. *RNA* 12:  
949 94-101.
- 950 52. Irwin B, Aye M, Baldi P, Beliakova-Bethell N, Cheng H, et al. (2005) Retroviruses and yeast  
951 retrotransposons use overlapping sets of host genes. *Genome Res* 15: 641-654.
- 952 53. Larsen LS, Beliakova-Bethell N, Bilanchone V, Zhang M, Lamsa A, et al. (2008) Ty3 nucleocapsid  
953 controls localization of particle assembly. *Journal of virology* 82: 2501-2514.
- 954 54. Larsen LS, Zhang M, Beliakova-Bethell N, Bilanchone V, Lamsa A, et al. (2007) Ty3 capsid  
955 mutations reveal early and late functions of the amino-terminal domain. *Journal of virology* 81:  
956 6957-6972.
- 957 55. Kimpton J, Emerman M (1992) Detection of replication-competent and pseudotyped human  
958 immunodeficiency virus with a sensitive cell line on the basis of activation of an integrated beta-  
959 galactosidase gene. *J Virol* 66: 2232-2239.

960 56. McEwen CR (1967) Tables for estimating sedimentation through linear concentration gradients of  
961 sucrose solution. Analytical biochemistry 20: 114-149.

962

963

964

965

966

967

968

969

970

971

972

973

974

975

976

977

978

979

980

981

982

983

984

985

986 **Figure Captions:**

987 **Fig 1. Gag constructs: diagrams and phenotypes**

988 **A)** Diagram of the different *cis* and *trans* expression systems used (Sets I – IV). Only WT constructs are  
989 shown here, with mutant constructs diagrammed in later figures. **Set I** consists of WT (and mutant) HIV-  
990 1 proviruses (pro-, delta env). **Set II** consists of codon-optimized WT (and mutant) Gag constructs fused  
991 to GFP (GagGFP), transfected with a modified genomic construct (V1B) provided *in trans*. **Set III**  
992 consists of proviruses from Set I in which the *nef* gene was replaced with a puromycin resistance gene  
993 (PURO-R). H9 T cells were infected with these constructs and maintained under puromycin selection to  
994 generate a chronically infected H9 T cell line expressing WT Gag (H9-HIV). In **Set IV** consists of V1B  
995 constructs (see Set II), which were engineered to express WT or mutant Gag *in cis*. Set VI constructs  
996 were transfected into HeLa-MCP-GFP cells, which express a GFP-tagged MS2 capsid protein (MCP) that  
997 contains a nuclear localization signal. Since V1B genomic constructs also contain MS2 binding sites,  
998 MCP-GFP binds to V1B, resulting in GFP tagging of V1B gRNA [8], which allows subsequent  
999 immunolabeling of V1B gRNA with GFP antibody.

1000 **B) Summary of expected Gag phenotypes.** Diagram indicates, for WT Gag and Gag mutants, whether  
1001 the packaging initiation complex is predicted to form and whether VLPs are known to be produced.  
1002 Released VLPs that contain or lack gRNA are indicated by ++ and +- respectively.

1003 **C) Confirmation of expected phenotypes for VLP production and packaging initiation complex**  
1004 **formation.** COS-1 cells were transfected with Set I constructs from A. Top row: WB shows Gag in cell  
1005 lysates and VLPs. Graph shows gRNA copy number, as determined by RT-qPCR, in VLPs or cell lysates  
1006 representing the equivalent of 1000 cells. Similar results were obtained in 293T cells. Bottom row: Cell  
1007 lysates expressing proviruses encoding WT or mutant Gag (Set I constructs in panel A) were subjected to  
1008 IP with  $\alpha$ Gag or nonimmune (N) antibody followed by Gag WB (left). IP eluates were also analyzed by  
1009 RT-qPCR for gRNA copies, with NI values subtracted (graph). Graph shows that only WT and G2A Gag  
1010 form intracellular complexes containing Gag associated with gRNA, thereby confirming packaging

1011 initiation complex phenotypes shown in B. Error bars show SEM from duplicate samples. Data are  
1012 representative of three independent repeats.

1013

1014 **Fig 2: Non-translating HIV-1 gRNA is primarily in diverse complexes >30S in the absence of**  
1015 **assembling Gag**

1016 **A-E)** Lysate from COS-1 cells transfected with the assembly-incompetent MACA provirus (Fig 1A, Set  
1017 I) was divided into two pools, that were either not treated or treated with PuroHS (-/+ PuroHS). Both  
1018 pools were analyzed in parallel by velocity sedimentation followed by RTqPCR of paired gradient  
1019 fractions using the appropriate qPCR primer sets to determine copy number of the indicated RNAs  
1020 (28SrRNA, 7SL RNA, HIV-1 gRNA, HIV-1 Tat mRNA, or GAPDH mRNA). Quantity of the indicated  
1021 RNAs in gradient fractions is expressed as a distribution (% of RNA in all fractions) to allow comparison  
1022 between different RNAs. Blot in panel C shows migration of MACA protein, which is also graphed as a  
1023 gray dotted line in C. Brackets at top show S value markers, and horizontal bars show expected  
1024 migrations of various RNPCs. Error bars show SEM from duplicate samples. Data are from a single  
1025 experiment that is representative of three independent repeats.

1026

1027 **Fig 3: The packaging initiation complex is an ~80S RNA granule**

1028 **A)** COS-1 cells transfected with indicated proviruses (Fig 1A, Set I) were harvested following PuroHS  
1029 treatment, and gRNA copy number per 1000 cells was determined. **B)** Lysates from A were analyzed by  
1030 velocity sedimentation, and gRNA copies per 1000 cells was determined and normalized to the inputs  
1031 shown in A. **C)** Gradient fractions from B were subjected to IP with HIV immune globulin ( $\alpha$ Gag), and  
1032 gRNA copy number in IP eluates per 1000 cells was determined and normalized to the inputs shown in A.  
1033 Similar results were obtained upon IP with monoclonal antibody to p24. **D)** COS-1 cells transfected with  
1034 the indicated G2A Gag provirus (Fig 1A, Set I) were harvested following PuroHS treatment, and total  
1035 gRNA copy number per 1000 cells was determined. **E)** Lysates from D were also analyzed by velocity  
1036 sedimentation, and gRNA copy number per 1000 cells in each fraction was determined. **F)** Gradient



1037 fractions from E were subjected to IP with  $\alpha$ DDX6, and IP eluates from each fraction were analyzed for  
1038 gRNA copy number per 1000 cells. Brackets at top show S value markers, and dotted lines demarcate  
1039 assembly intermediates based on their WB migrations. Error bars show SEM from duplicate samples.  
1040 Data in each column are from a single experiment that is representative of three independent repeats.

1041

1042 **Fig 4: WT Gag forms the packaging initiation complex and a late packaging intermediate,**  
1043 **including in infected human T cells**

1044 **A)** COS-1 cells transfected with the indicated construct (Fig 1A, Set II) were harvested following PuroHS  
1045 treatment, and gRNA copy number per 1000 cells was determined. **B)** Lysate from A was analyzed by  
1046 velocity sedimentation, and gRNA copy number per 1000 cells in each fraction was determined and  
1047 normalized to the inputs shown in A. **C)** Gradient fractions from B were subjected to IP with  $\alpha$ GFP, and  
1048 gRNA copy number per 1000 cells was determined for IP eluates from each fraction and normalized to  
1049 input in A. **D)** H9 cells chronically infected with the indicated provirus (H9-HIV; Fig 1A; Set III) were  
1050 harvested following PuroHS treatment, and gRNA copy number per 1000 cells was determined for each  
1051 fraction. **E)** Lysate from D was also analyzed by velocity sedimentation, and gRNA copy number per  
1052 1000 cells in each fraction was determined. **F)** Gradient fractions from E were subjected to IP with  
1053  $\alpha$ ABCE1 and gRNA copy number per 1000 cells was determined for IP eluates from each fraction.  
1054 Brackets at top show S value markers, and dotted lines demarcate assembly intermediates based on their  
1055 WB migrations. Error bars show SEM from duplicate samples. Data in each column are from a single  
1056 experiment that is representative of three independent repeats.

1057

1058 **Fig 5: GagZip fails to associate with gRNA-containing granules, but is rescued by a heterologous**  
1059 **gRNA-binding domain**

1060 **A)** COS-1 cells transfected with indicated constructs (Fig 1A, Set II) were harvested following PuroHS  
1061 treatment, and gRNA copy number per 1000 cells was determined. **B)** Lysates from A were analyzed by  
1062 velocity sedimentation, and gRNA copy number per 1000 cells in each fraction was determined and

1063 normalized to the inputs shown in A. **C)** Gradient fractions from B were subjected to IP with  $\alpha$ GFP, and  
1064 gRNA copy number per 1000 cells was determined for IP eluates from each fraction and normalized to  
1065 input in A. **D)** COS-1 cells transfected with indicated constructs (Fig 1A, Set II) were harvested  
1066 following PuroHS treatment, and gRNA copy number per 1000 cells was determined. **E)** Lysates from D  
1067 were analyzed by velocity sedimentation, and gRNA copy number per 1000 cells in each fraction was  
1068 determined and normalized to the inputs shown in A. **F)** Gradient fractions from E were subjected to IP  
1069 with  $\alpha$ GFP, and gRNA copy number per 1000 cells was determined for IP eluates from each fraction.  
1070 Brackets at top show S value markers, and dotted lines demarcate assembly intermediates based on their  
1071 WB migrations. Error bars show SEM from duplicate samples. Data in each column are from a single  
1072 experiment that is representative of two independent repeats.

1073

1074 **Fig 6: Gag-DDX6 colocalization *in situ* upon provirus expression**

1075 PLA was used to detect regions in which Gag is within 40 nm from DDX6 *in situ*, with concurrent  $\alpha$ Gag  
1076 IF for quantification of intracellular Gag levels. **A)** Experimental schematic and diagrams of proviruses  
1077 transfected into 293T cells (Fig 1A, Set 1). **B)** The average number of PLA spots per cell was determined  
1078 for all Gag-positive cells in five randomly chosen fields, and normalized to Gag levels. Error bars show  
1079 SEM. **C)** Representative images. From left to right for each construct: Gag IF (green) with DAPI-stained  
1080 nuclei (blue), Gag-DDX6 PLA signal (red) with DAPI-stained nuclei (blue), and a merge of all three.  
1081 Merge demonstrates that PLA spots are mainly in Gag-expressing cells. Inset in PLA panel shows a high  
1082 magnification view of the cell to the right of the inset. Scale bars, 5  $\mu$ M. Data are representative of three  
1083 independent repeats. Error bars show SEM (n=10 cells). \*\* indicates a significant difference relative to  
1084 WT ( $p \leq 0.001$ ).

1085

1086 **Fig 7: Gag-ABCE1 colocalization *in situ* upon provirus expression**

1087 PLA was used to detect regions in which Gag is within 40 nm from ABCE1 *in situ*, with concurrent  $\alpha$ Gag  
1088 IF for quantification of intracellular Gag levels. **A)** Experimental schematic and diagrams of proviruses  
1089 transfected into 293T cells (Fig 1A, Set 1). **B)** The average number of PLA spots per cell was determined  
1090 for all Gag-positive cells in five randomly chosen fields, and normalized to Gag levels. Error bars show  
1091 SEM. **C)** Representative images. From left to right for each construct: Gag IF (green) with DAPI-stained  
1092 nuclei (blue), Gag-ABCE1 PLA signal (red) with DAPI-stained nuclei (blue), and a merge of all three.  
1093 Merge demonstrates that PLA spots are mainly in Gag-expressing cells. Inset in PLA panel shows a high  
1094 magnification view of the cell to the left of the inset. Scale bars, 5  $\mu$ M. Data are representative of three  
1095 independent repeats. Error bars show SEM (n=10 cells). \* indicates a significant difference relative to  
1096 WT ( $p \leq 0.01$ ).

1097

1098 **Fig 8: Packaging initiation complexes containing Gag and DDX6 are far more numerous than P**  
1099 **bodies**

1100 PLA was used to identify regions in which Gag is within 40 nm from DDX6 *in situ*, with concurrent  
1101  $\alpha$ DDX6 IF for quantification of P bodies. **A)** Experimental schematic. 293T cells were transfected with  
1102 the indicated G2A provirus (Fig 1A, Set 1) or mock transfected. **B)** The average number of P bodies per  
1103 cell (green bar) or PLA spots per cell (red bar) was determined for all Gag-positive cells in five randomly  
1104 chosen fields. Error bars show SEM (n=10 cells). **C)** Representative images. From left to right for G2A  
1105 Gag and Mock: DDX6 IF to detect P bodies (green) overlaid with nuclei (blue), PLA signal (red)  
1106 overlaid with nuclei (blue), and a merge of all three. Insets in DDX6 IF panels show a high gain/high  
1107 magnification version of cell to left, revealing a diffuse, low intensity DDX6 signal (example in dotted  
1108 oval). Arrows indicate the same two P bodies in low and high magnification images. Insets in merged  
1109 panels show a high gain/high magnification version of two cells to right. Scale bar, 5  $\mu$ M. Data are  
1110 representative of three independent repeats.

1111

1112 **Fig 9. The gRNA-DDX6 association at PM assembly sites is observed *in situ* for WT Gag but not for**  
1113 **GagZip**

1114 **A)** HeLa cells expressing MCP-GFP were transfected with V1B genomes that contain MS2 binding sites  
1115 (Fig 1A, Set IV constructs) and express WT Gag (shown), GagZip, or MACA (diagrams not shown).  
1116 Cells were analyzed by double-label IEM, using  $\alpha$ DDX6 (large gold), and  $\alpha$ GFP, which allowed detection  
1117 of MCP-GFP labeled gRNA (small gold). All early and late assembly sites at the PM were identified in  
1118 ten cells (~250  $\mu$ m of PM total per group), and scored for gRNA labeling, DDX6 labeling, and double  
1119 labeling. **B)** Graph shows the percentage of all early and late PM assembly events that are DDX6-labeled  
1120 (total DDX6+), gRNA-labeled (total gRNA +), or double-labeled (gRNA+/DDX6+). Error bars show  
1121 SEM (n=10 cells). \*\*\* indicates a significant difference between WT Gag and GagZip (p<0.005). For  
1122 additional data, see Table S1. **C)** Images show representative assembly sites at the PM for each group,  
1123 with symbols indicating early or late PM assembly sites that are single-labeled for either gRNA or DDX6  
1124 (dark arrows), double-labeled (asterisks), or unlabeled (open arrows). Dotted lines outline the PM. Scale  
1125 bars, 200 nm.

1126

1127 **Fig 10. Model for how HIV-1 gRNA packaging is initiated within a subclass of host RNA granules**

1128 **A)** MACA Gag, which lacks NC, fails to associate with RNA granules. In contrast, the targeting-  
1129 defective G2A Gag mutant associates with ~80S RNA granules that contain gRNA, leading to packaging  
1130 initiation complex formation in the cytoplasm without further progression. WT Gag also associates with  
1131 RNA granules and forms the packaging initiation complex in the cytoplasm, which is then targeted to the  
1132 PM where Gag multimerizes to complete assembly. RNA granule proteins dissociate from the fully  
1133 assembled capsid prior to VLP budding and release. GagZip also targets to ~80S RNA granules, but  
1134 because it contains a protein-protein dimerization domain in place of the gRNA-binding NC domain it is  
1135 unable to target to the subset of ~80S granules that contains gRNA. Ultimately, GagZip also undergoes  
1136 PM targeting, assembly, dissociation of RNA granule proteins, and VLP release; however, GagZip VLPs  
1137 lack gRNA because the gRNA-binding-deficient GagZip targeted to the “wrong” subset of ~80S granules.

1138 **B)** The two-step model for initial targeting of Gag to gRNA-containing RNA granules is shown in more  
1139 detail. Only a subset of ~80S RNA granules contain gRNA. While MACA Gag does not associate with  
1140 any RNA granule subsets, G2A and WT Gag target to the subset of RNA granules that contains gRNA.  
1141 GagZip targets to RNA granules regardless of whether they contain gRNA; however, a heterologous  
1142 gRNA-binding domain (MCP) is able to rescue GagZip, allowing it to target to gRNA-containing ~80S  
1143 granules.

1144

1145

1146

1147

1148

1149

1150

1151

1152

1153

1154

1155

1156

1157

1158

1159

1160

1161

1162

1163

1164 **Supporting Information Captions:**

1165 **Fig. S1: Packaging initiation and VLP phenotypes for V1B *in trans* and *in cis* constructs.**

1166 **A)** COS-1 cells were cotransfected with WT or mutant codon-optimized Gag fused to GFP (GagGFP)  
1167 along with a genomic construct (V1B) provided *in trans* (Fig. 1A, Set II). Diagram shows schematic of  
1168 constructs. Top: Gag WB of cells and VLPs. Graph shows gRNA copy number in VLP pellets from the  
1169 equivalent of 1000 cells, as determined by RT-qPCR. Bottom: Lysates of cells transfected as in A were  
1170 subjected to IP with  $\alpha$ GFP or nonimmune (N) antibody followed by Gag WB (left), with IP inputs shown  
1171 (center).

1172 **B)** HeLa cells expressing MCP-GFP were transfected with V1B genomes that contain MS2 binding sites  
1173 and express WT Gag, G2A, GagZip, or MACA (Fig. 1A, Set IV constructs). Diagram shows schematic  
1174 of constructs. Also shown is a Gag WB of cells and VLPs. Graph shows gRNA copy number in VLP  
1175 pellets from the equivalent of 1000 cells, as determined by RT-qPCR, with mock background for VLPs  
1176 subtracted.

1177

1178 **Fig. S2: Association of gRNA with Gag and ABCE1 in the ~80S packaging initiation complex and**  
1179 **~500S late packaging intermediate.**

1180 **A)** 293T cells transfected with the indicated WT Gag construct (Fig. 1A, Set II) were harvested +  
1181 PuroHS, and gRNA copy number per 1000 cells was determined. **B)** Lysates from B were also analyzed  
1182 by velocity sedimentation, and gRNA copy number from the equivalent of 1000 cells determined. **C)**  
1183 Gradient fractions from B were subjected to IP with  $\alpha$ GFP, and gRNA copy number in IP eluates per  
1184 1000 cells determined. **D)** COS-1 cells transfected with the indicated construct (Fig. 1A, Set II) were  
1185 harvested and analyzed as in A. **E)** Lysate from D was analyzed as in B. **C)** Gradient fractions from E  
1186 were subjected to IP with  $\alpha$ ABCE1, and gRNA copy number in IP eluates from the equivalent of 1000  
1187 cells determined. Brackets at top show S value markers, and dotted lines demarcate assembly  
1188 intermediates based on their migrations in the Gag WB. Error bars, SEM from duplicate samples. Data  
1189 represent three independent repeats.

1190 **Fig. S3: Immunoprecipitation and VLP analysis of GagZip constructs**

1191 **A)** COS-1 cells were cotransfected with a codon-optimized construct expressing either WT Gag or  
1192 GagZip fused to GFP and a genomic construct (V1B) provided *in trans*. Cells were harvested following  
1193 PuroHS treatment and analyzed by velocity sedimentation. Paired gradient fractions were subjected to  
1194  $\alpha$ GFP IP, followed by WB with HIV immune globulin to allow detection of Gag. **B)** COS-1 cells  
1195 transfected with indicated constructs (Fig. 1A, Set II) and lysates and VLPs were harvested. WB shows  
1196 Gag in cell lysates and VLPs. Graph shows gRNA copy number, as determined by RT-qPCR, in VLPs or  
1197 cell lysates representing the equivalent of 1000 cells.

1198

Fig. 2: Non-translating HIV-1 gRNA is primarily in diverse complexes >30S in the absence of assembling Gag

**A** Transfected MACA provirus:

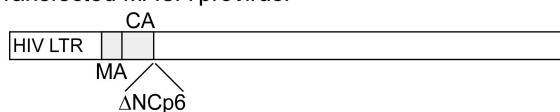

**B**

SRP

dissociated small & large subunits

intact monosomes

intact polysomes

$\leq 5S$  10-20S  $\sim 40S \sim 60S$   $\sim 80S$   $\geq 150S$

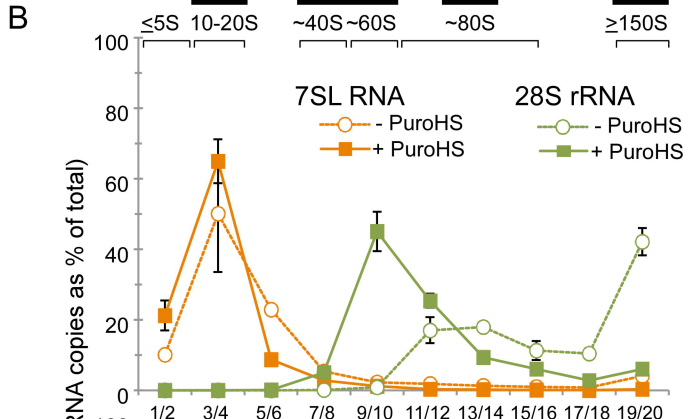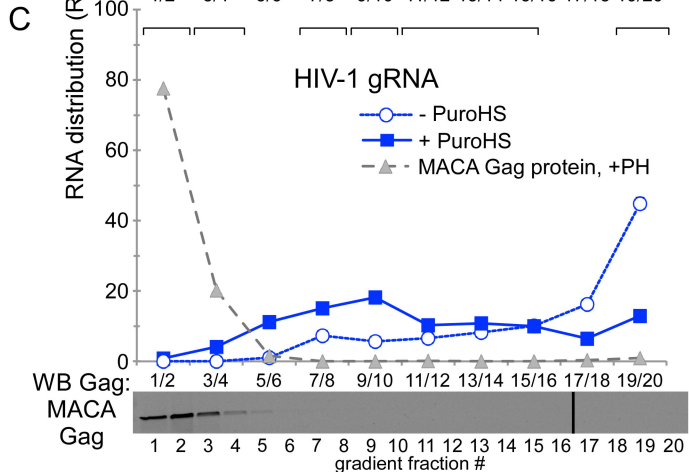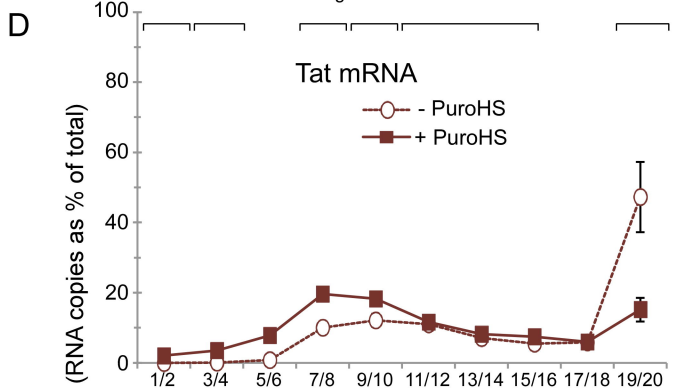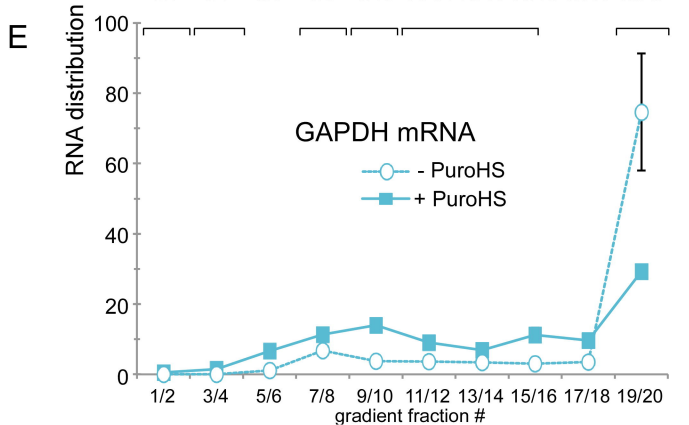



Fig. 3: The packaging initiation complex is an ~80S RNA granule

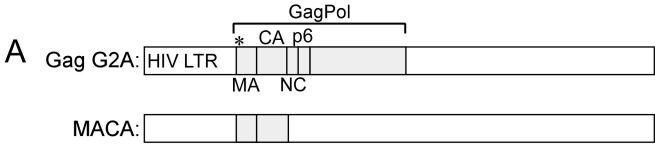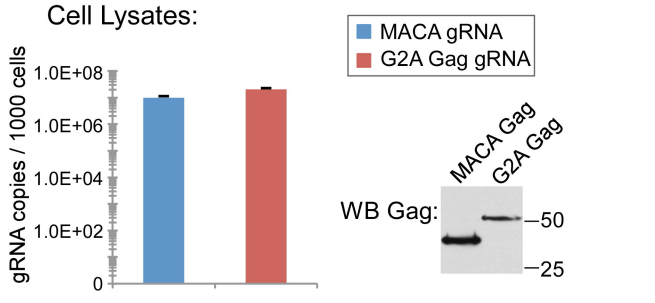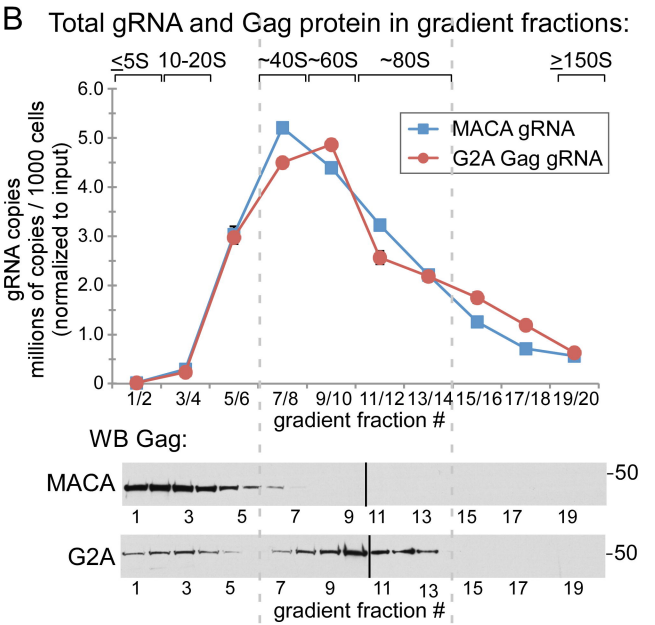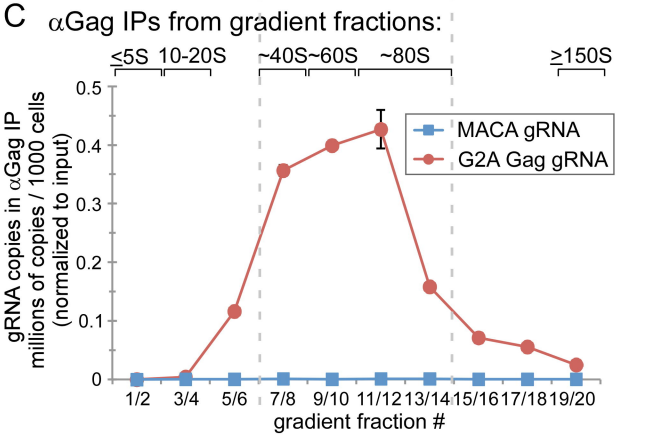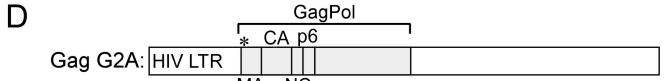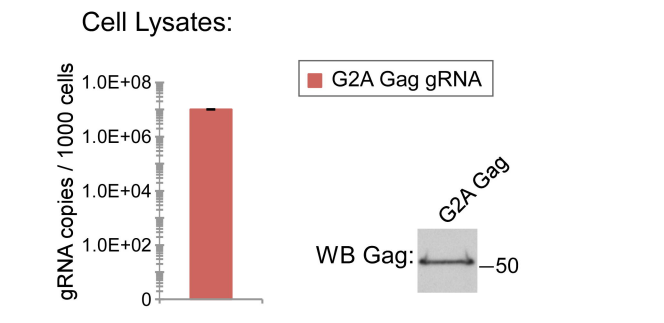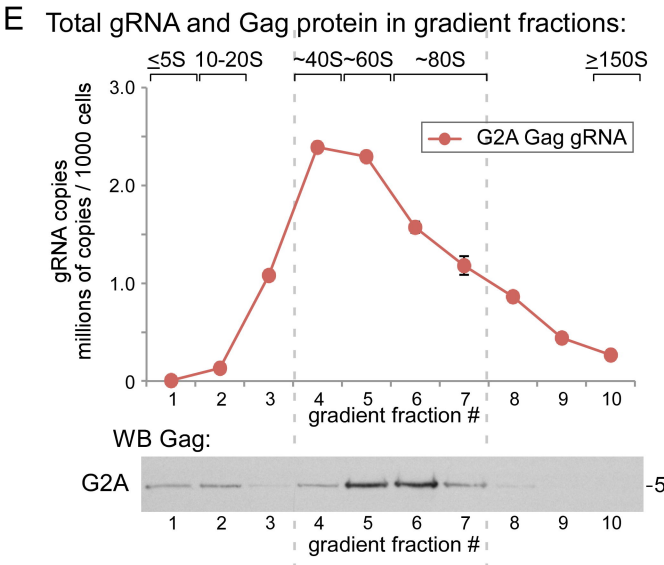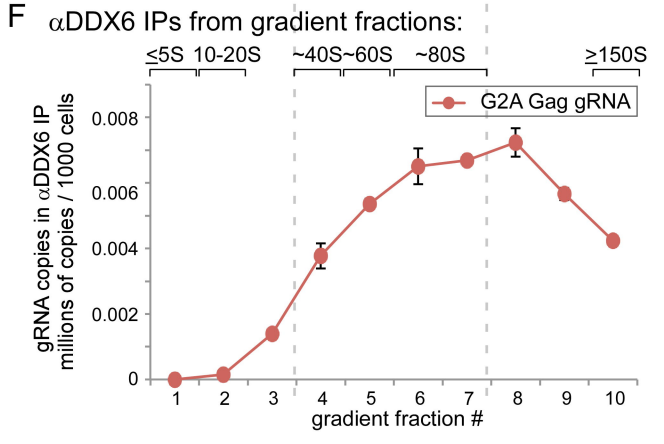

Fig. 4: WT Gag forms the packaging initiation complex and a late packaging intermediate, including in infected human T cells

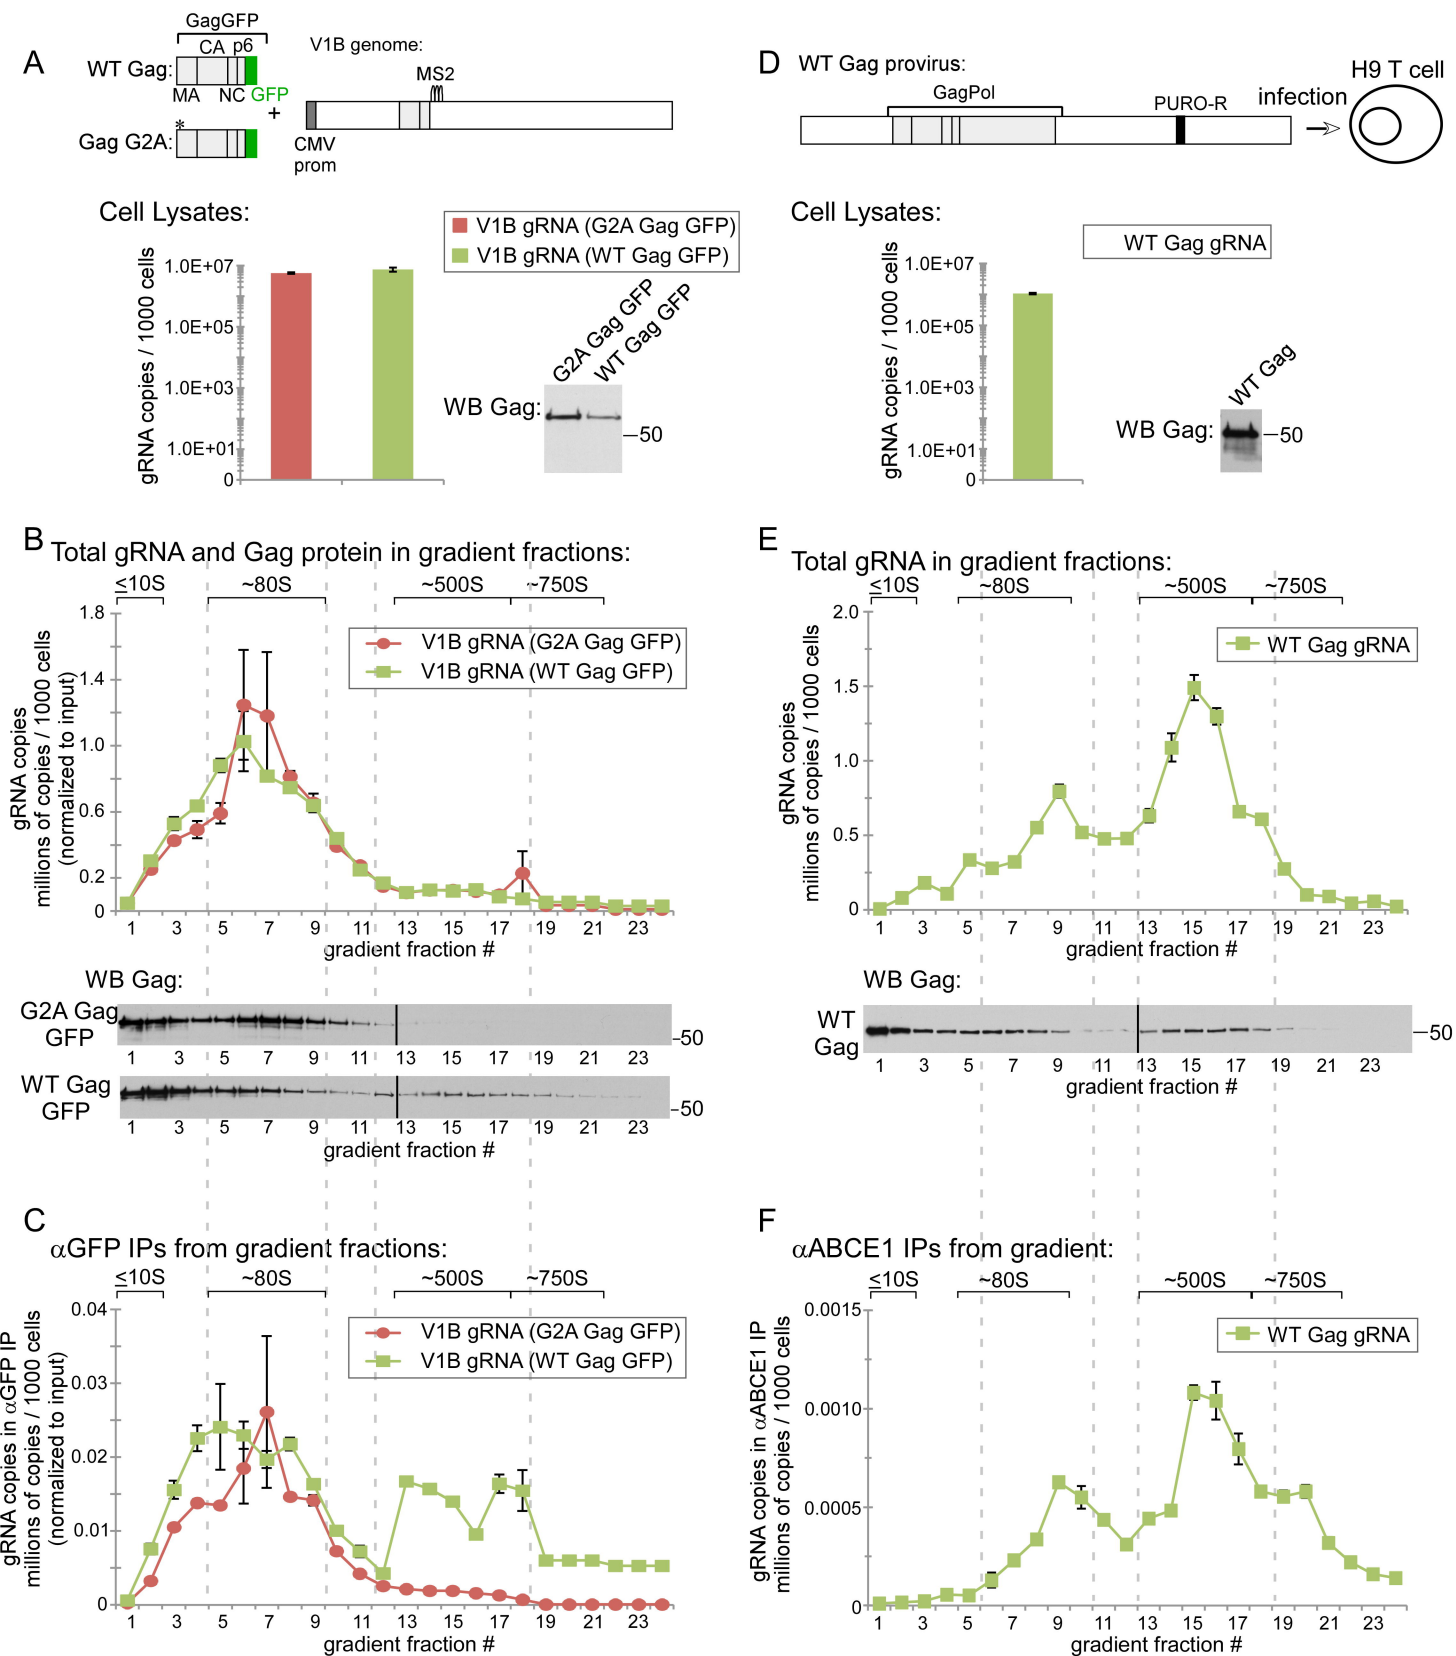

Fig. 5: GagZip fails to associate with gRNA-containing granules, but is rescued by a heterologous gRNA binding domain

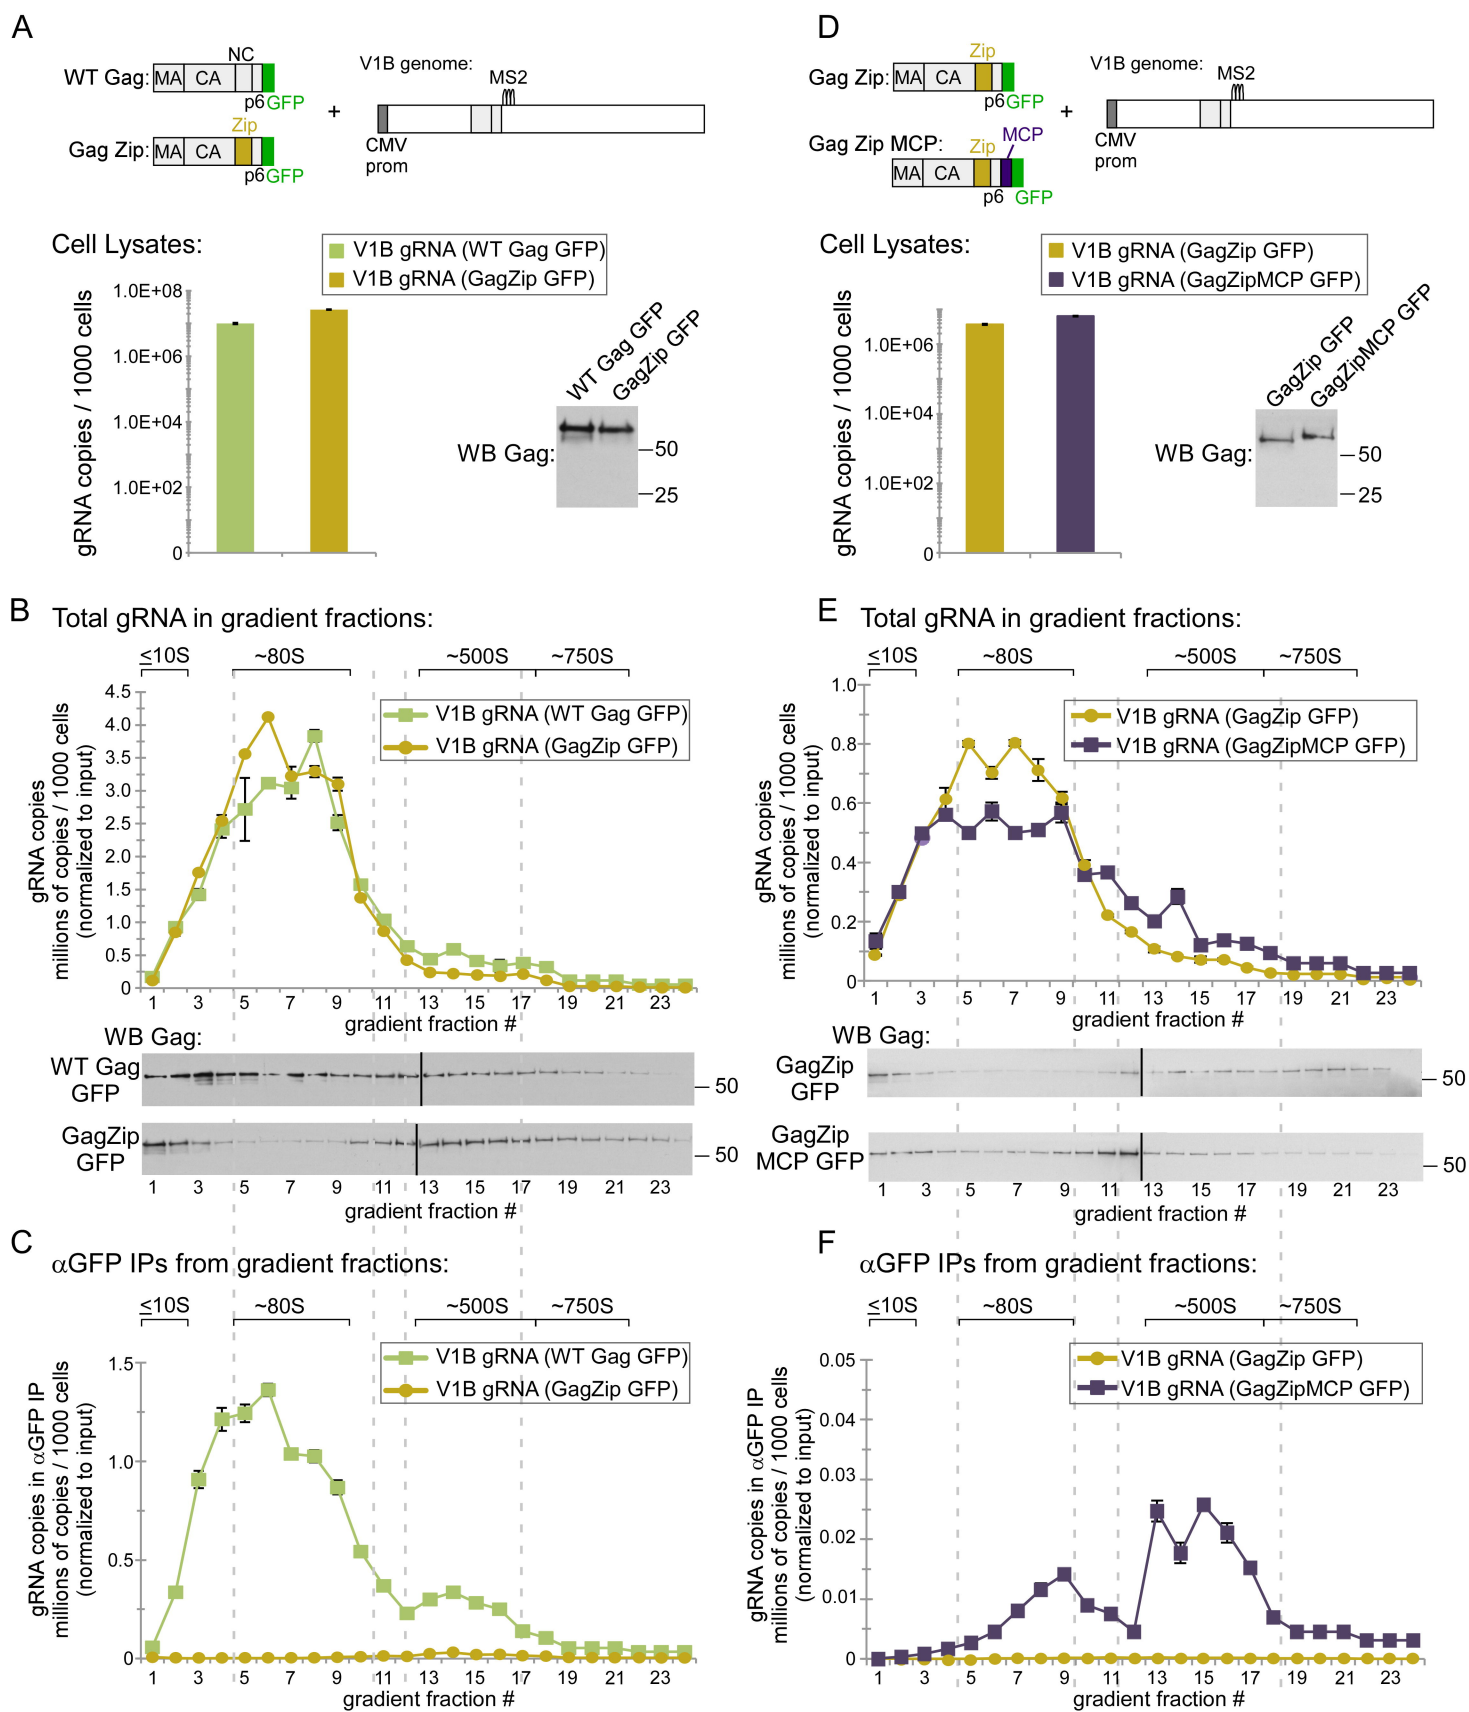

Fig. 6: Gag-DDX6 colocalization *in situ* upon provirus expression

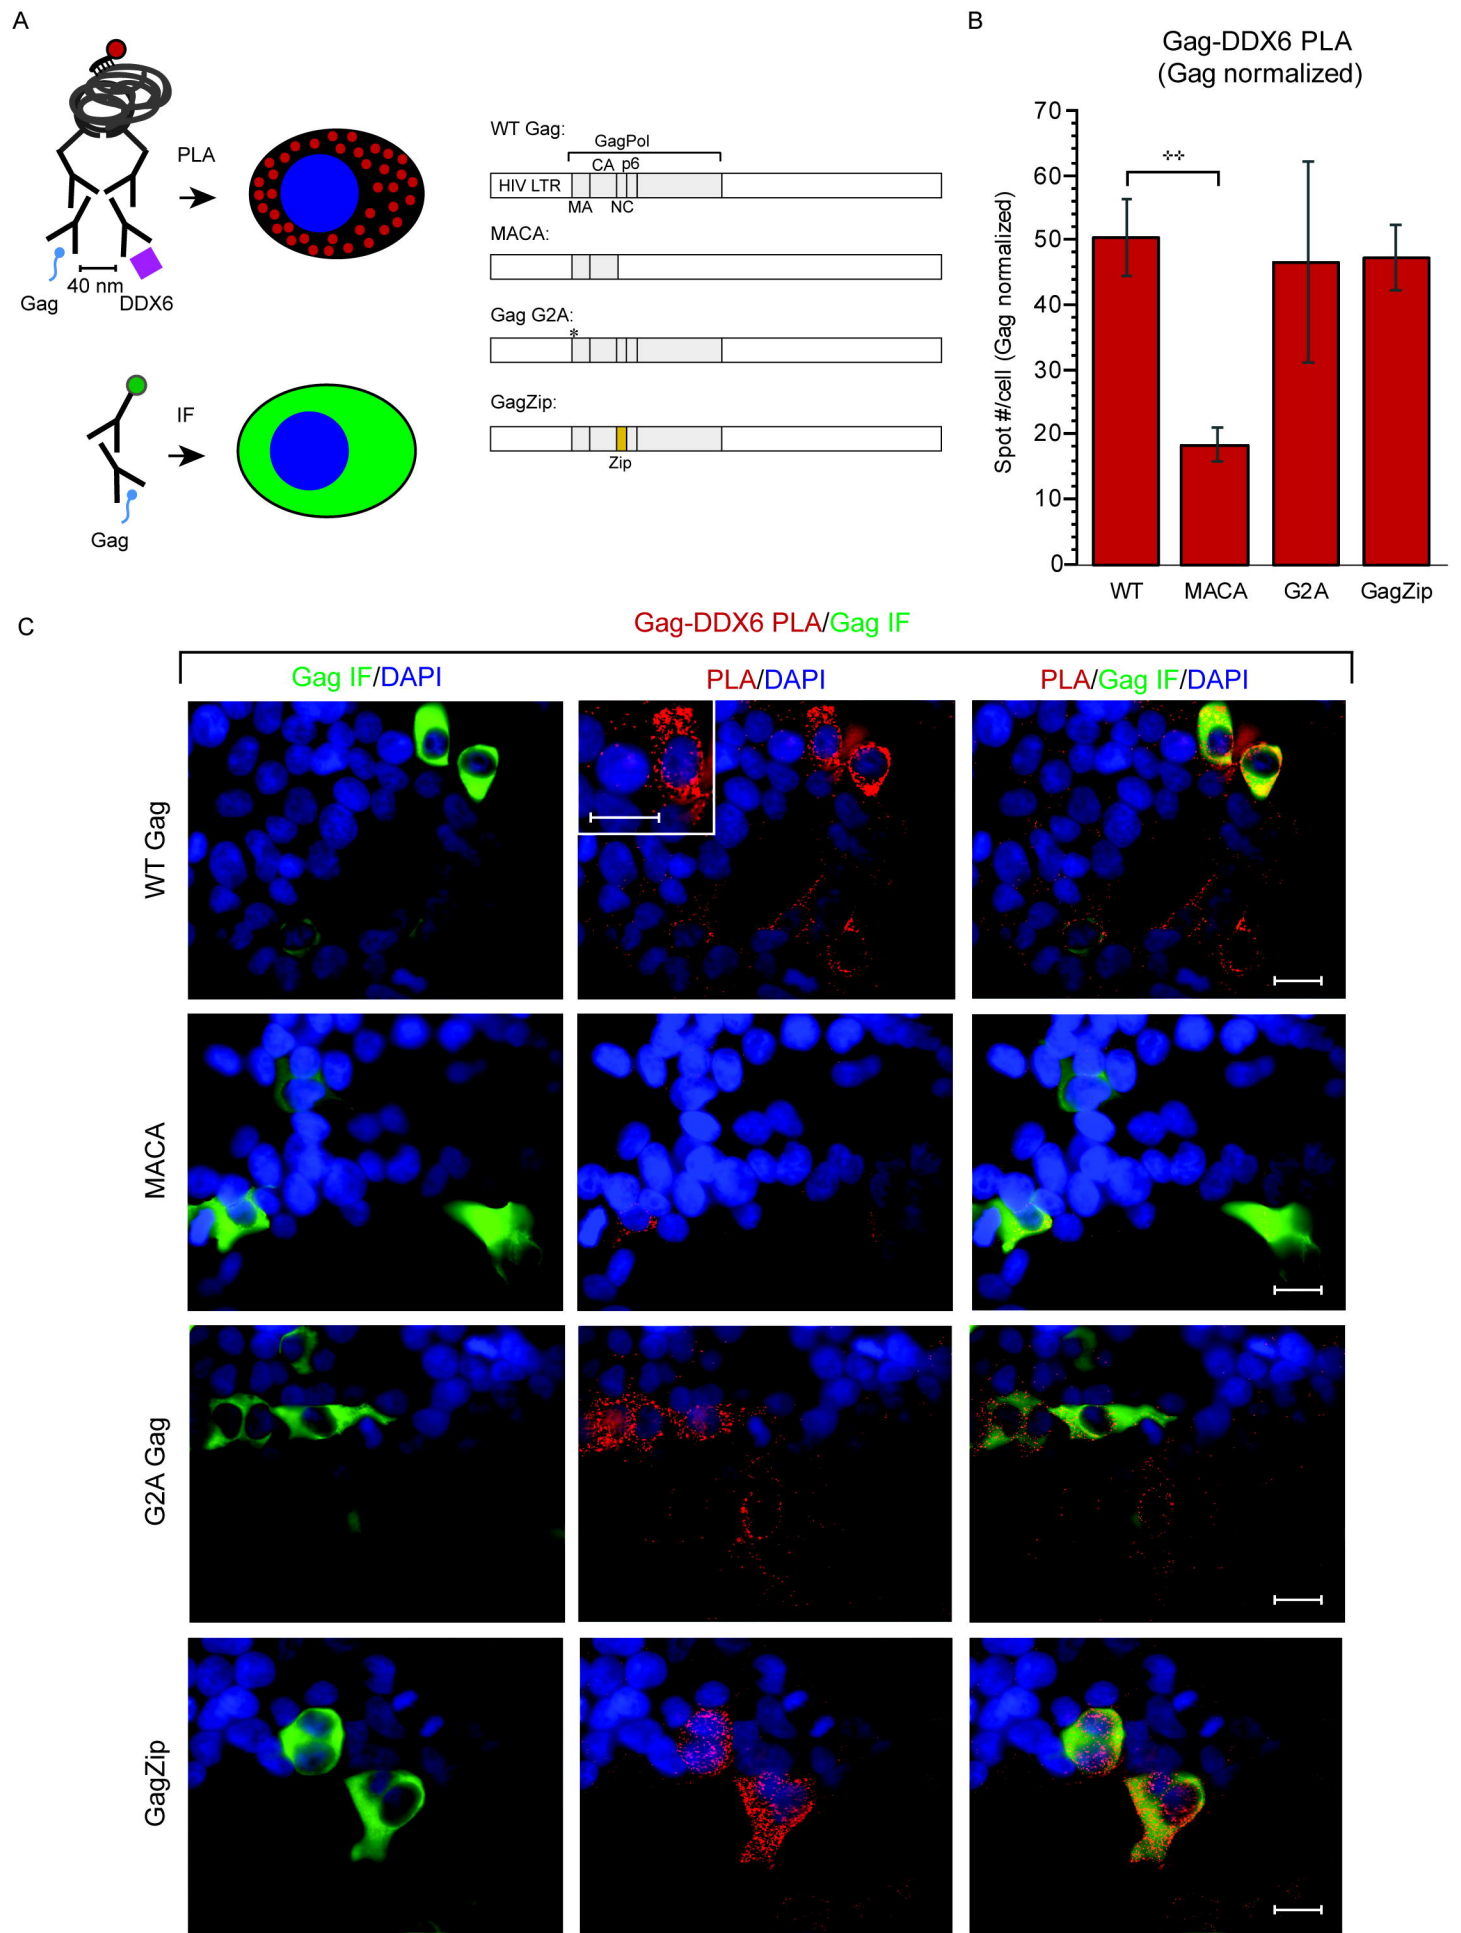

Fig. 7: Gag-ABCE1 colocalization *in situ* upon provirus expression

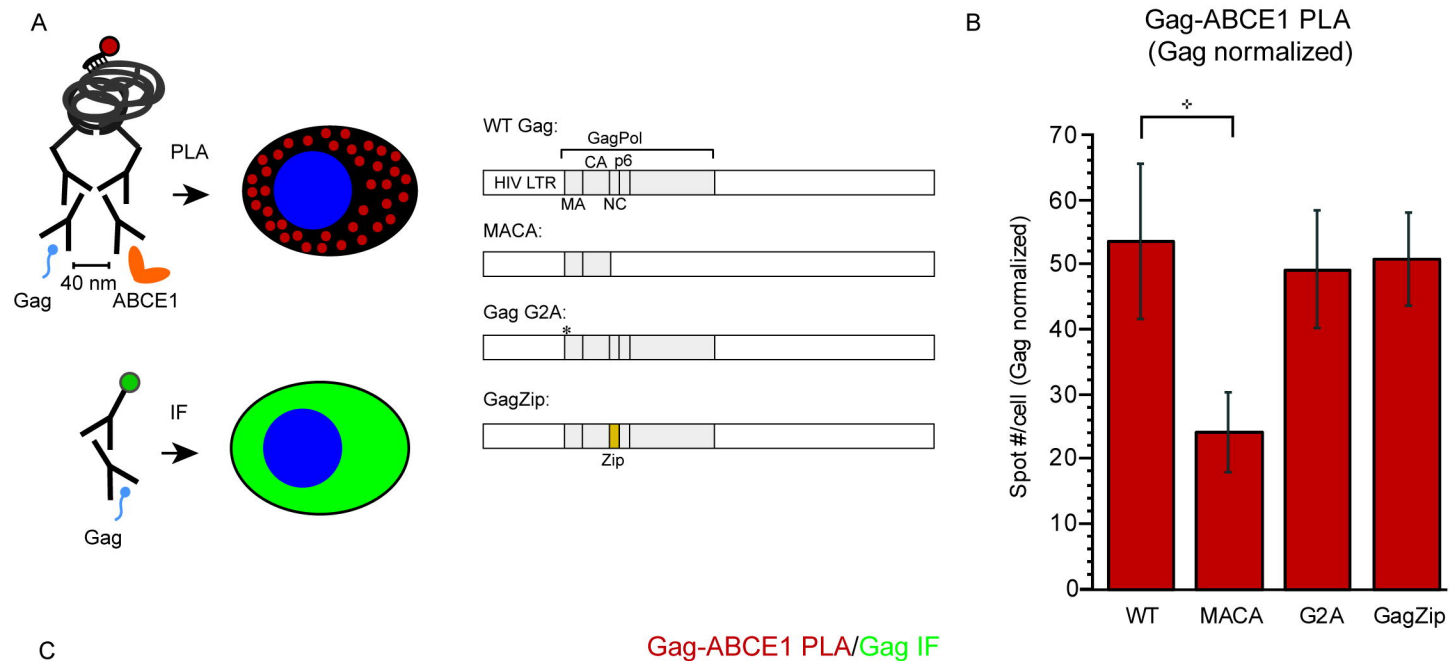

**C**

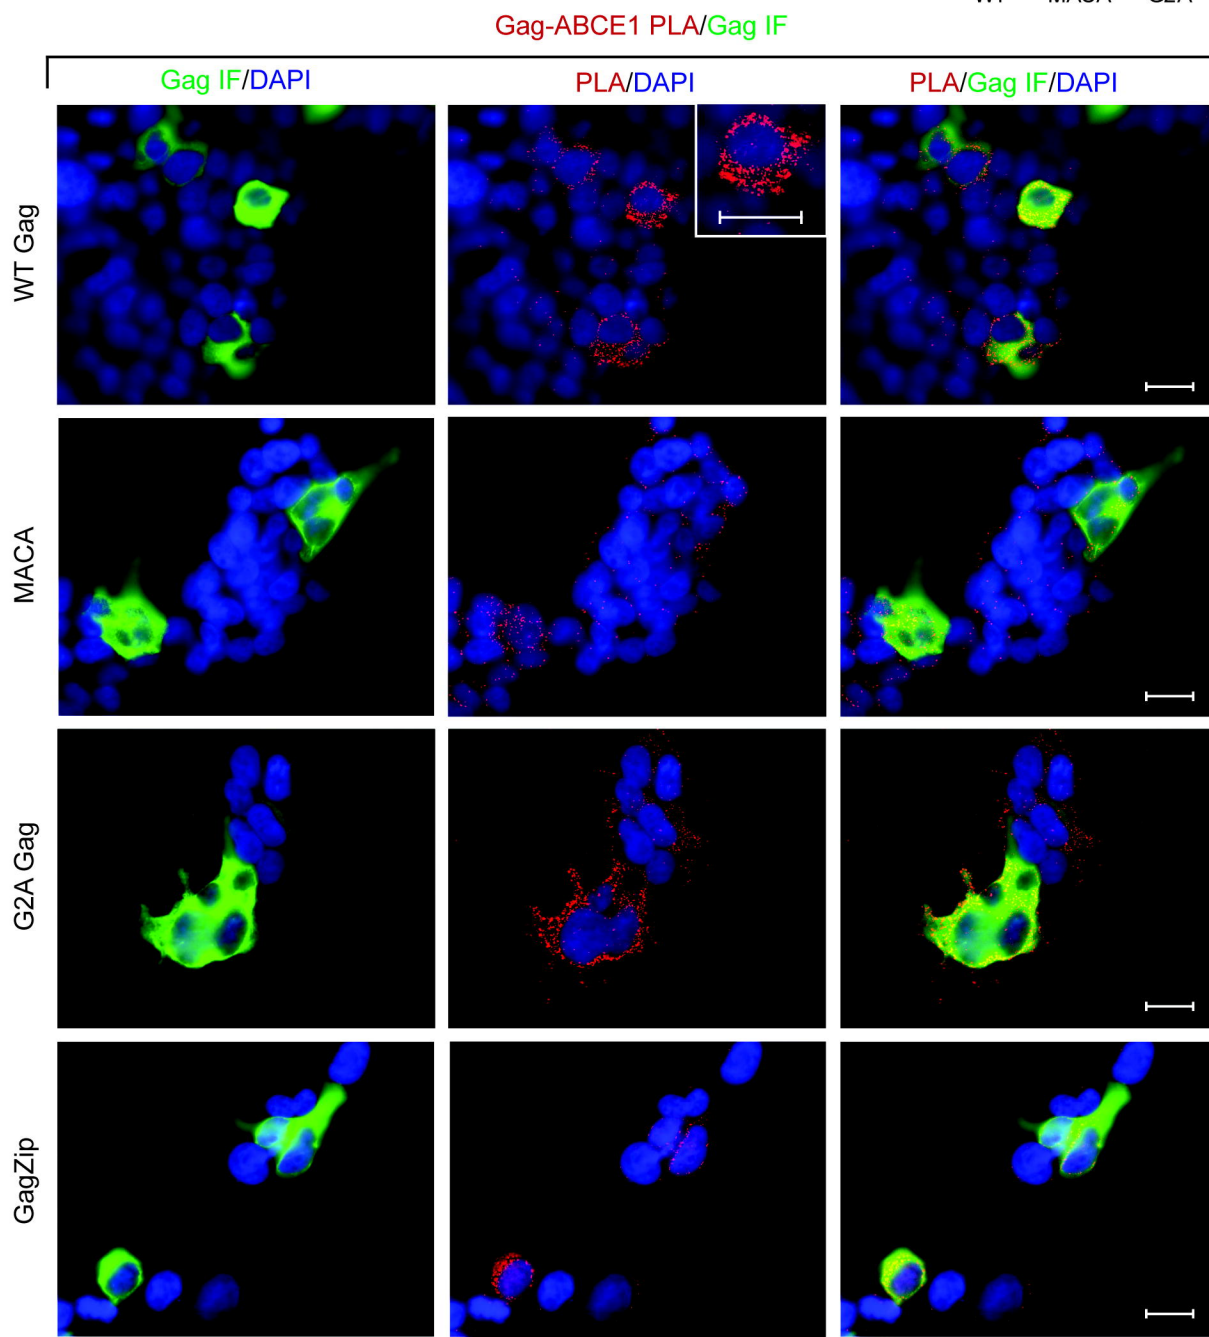

Fig. 8: Packaging initiation complexes containing Gag and DDX6 are far more numerous than P bodies.

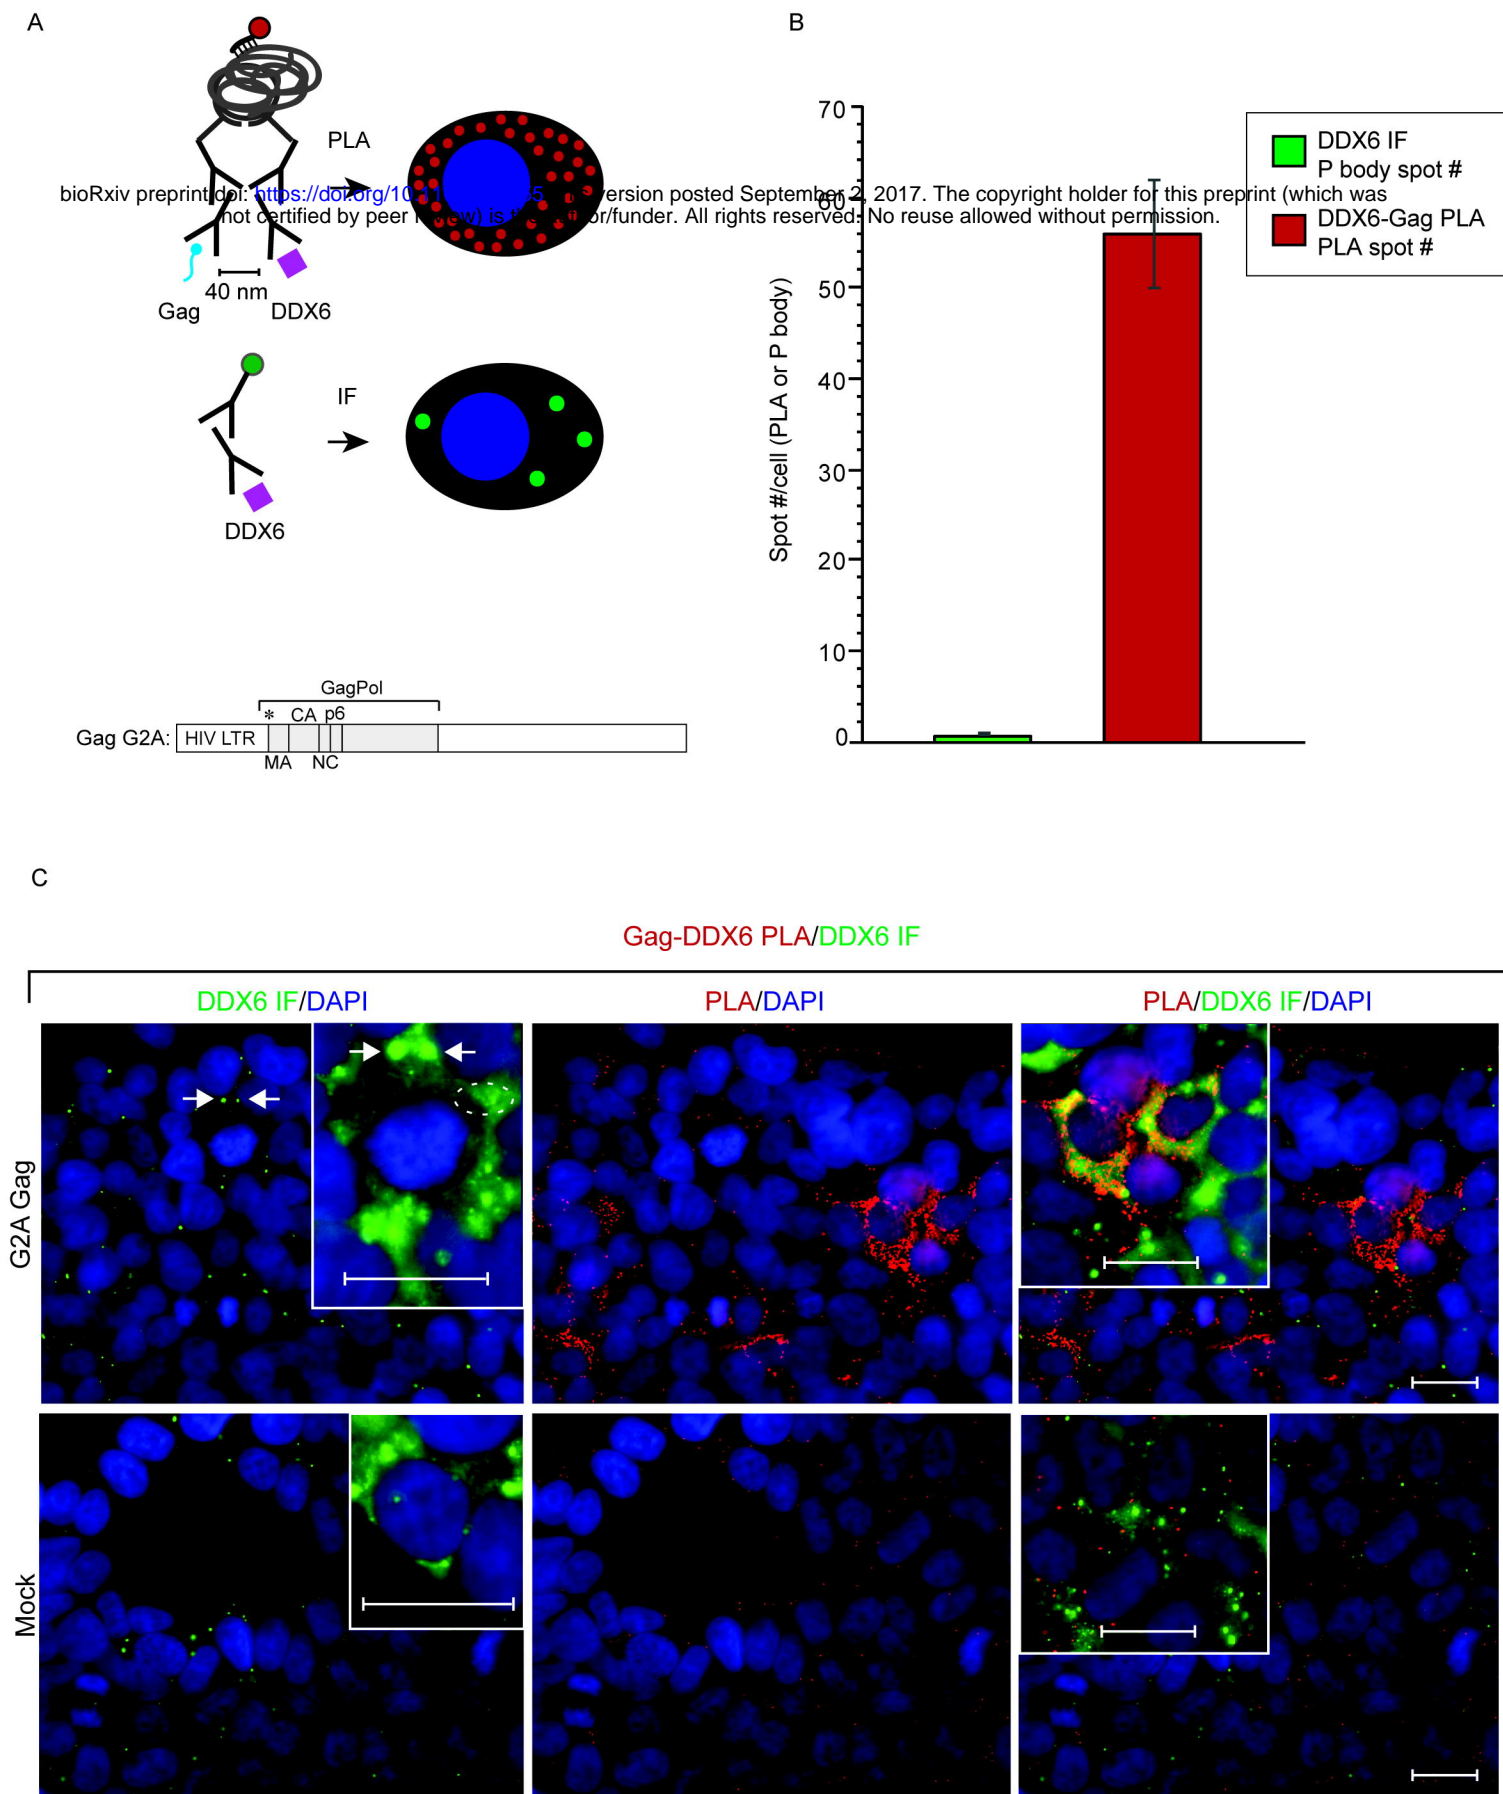

Fig. 9. The gRNA-DDX6 association at PM assembly sites is observed *in situ* for WT Gag but not for GagZip

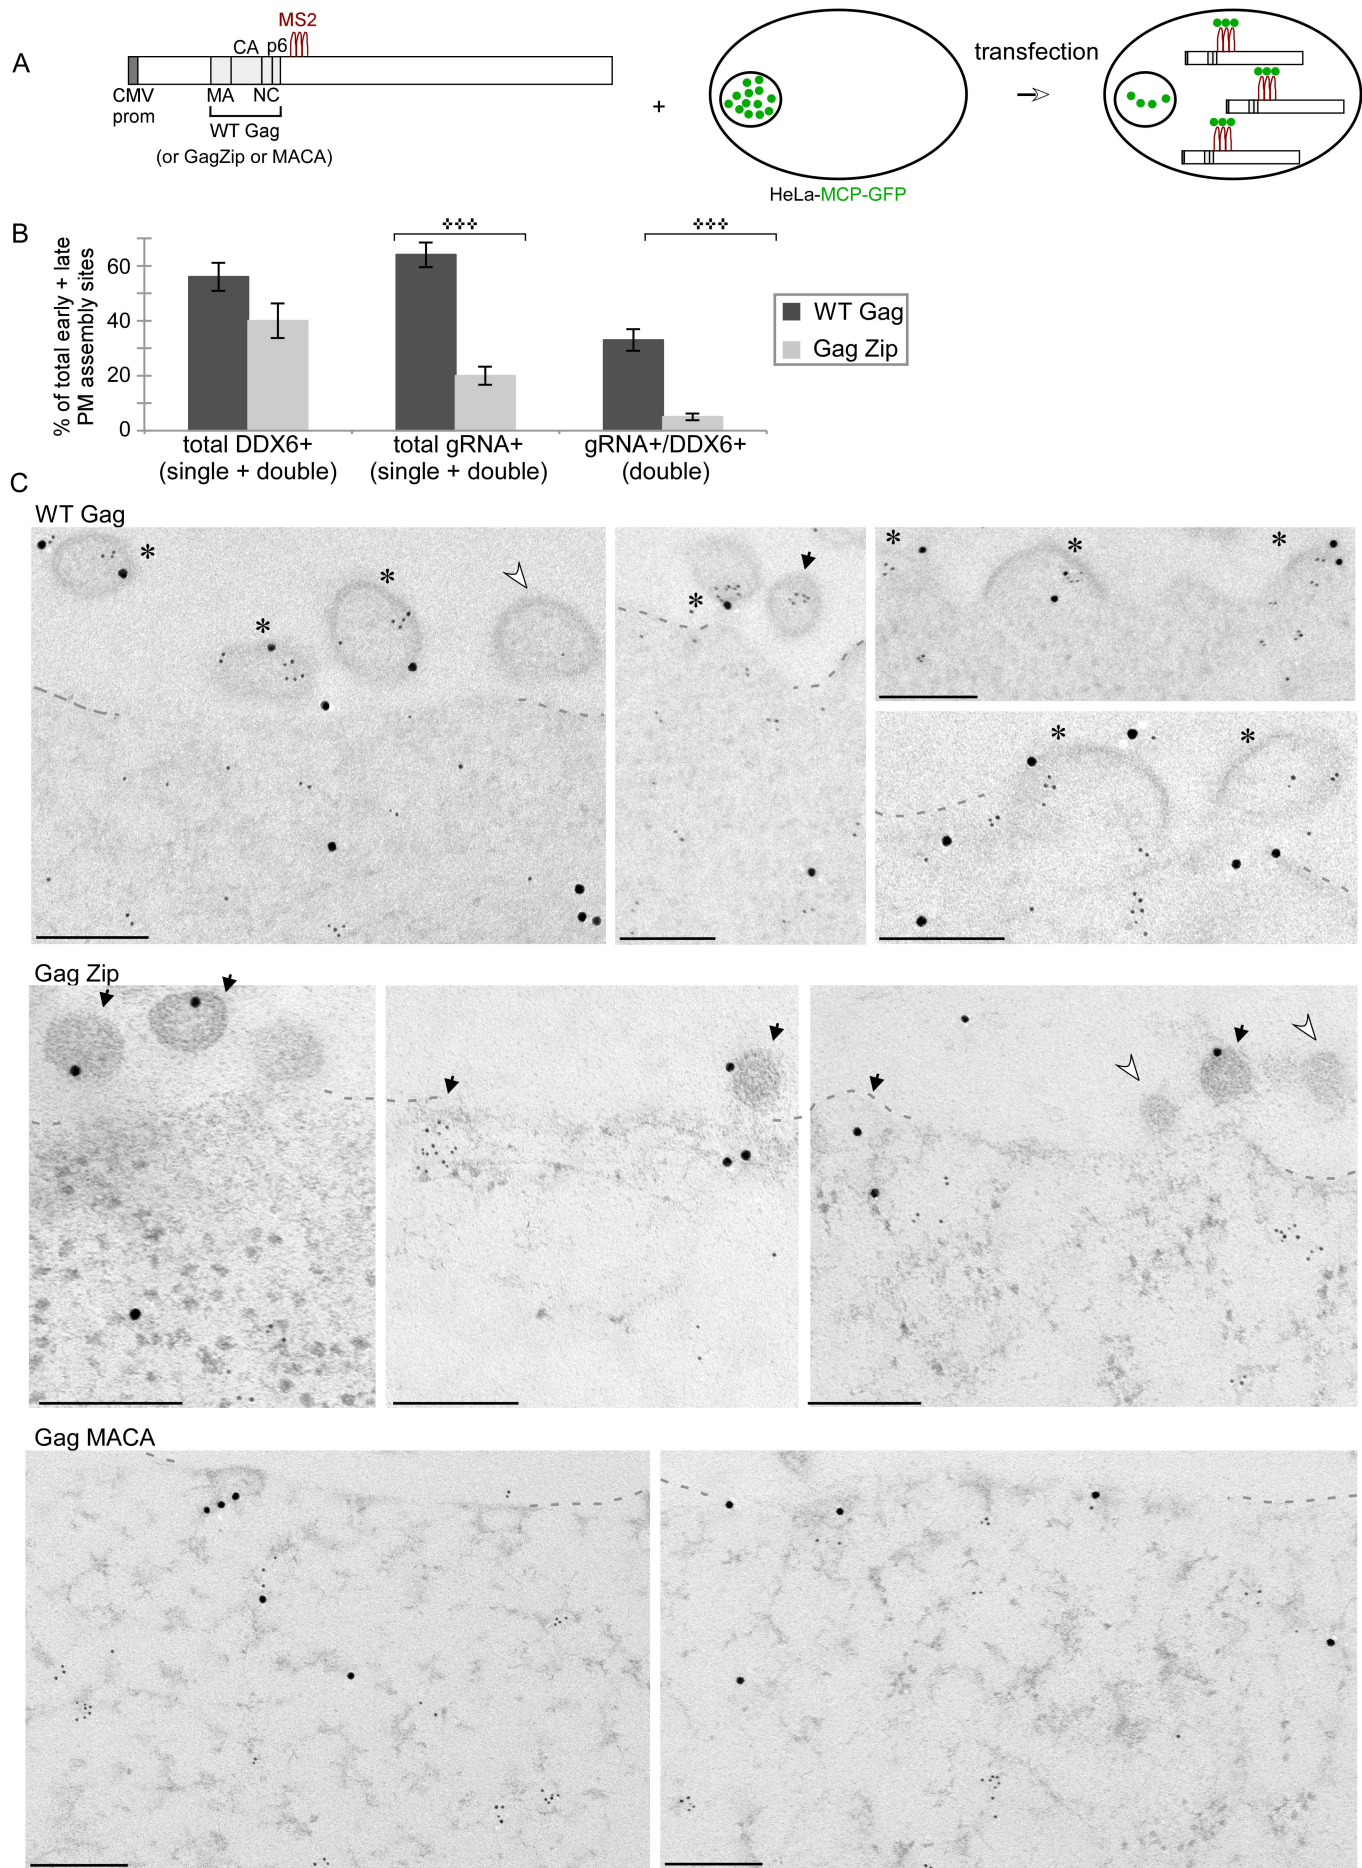

Fig. 1: Gag constructs: diagrams and phenotypes

A

Set I. Transfected HIV-1 provirus (mutants not shown): Set II. Transfected GagGFP +/- V1B-MS2 genome *in trans* (mutants not shown):

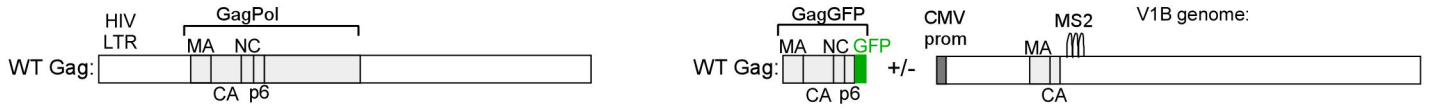

Set III. Chronically infected H9-HIV:

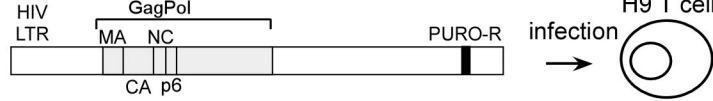

Set IV. V1B-MS2 genome expressing Gag *in cis* transfected into HeLa-MCP-GFP (mutants not shown):

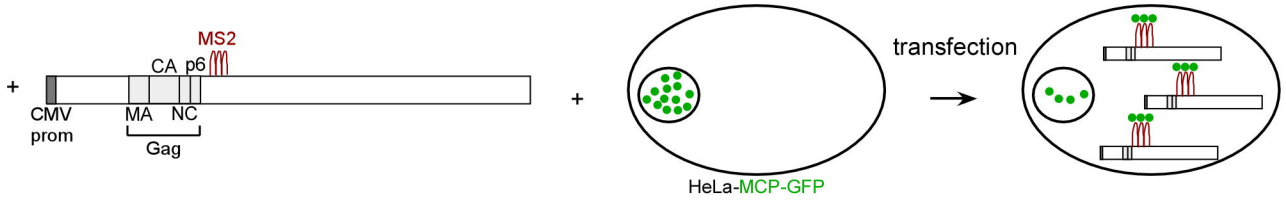

B

Gag phenotypes:

|          | Gag (proviral) | GagGFP <i>in trans</i> | gRNA packaging initiation complex: | VLP (+/- gRNA): |
|----------|----------------|------------------------|------------------------------------|-----------------|
| WT Gag:  | MA CA NC p6    | MA CA NC p6            | +                                  | + (+)           |
| MACA:    | MA CA          | MA CA                  | -                                  | -               |
| G2A Gag: | MA CA NC p6    | MA CA NC p6            | +                                  | -               |
| Gag Zip: | MA CA Zip p6   | MA CA Zip p6           | -                                  | + (-)           |

C

HIV-1 provirus (Set I):

VLP:

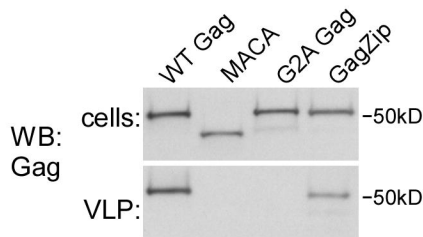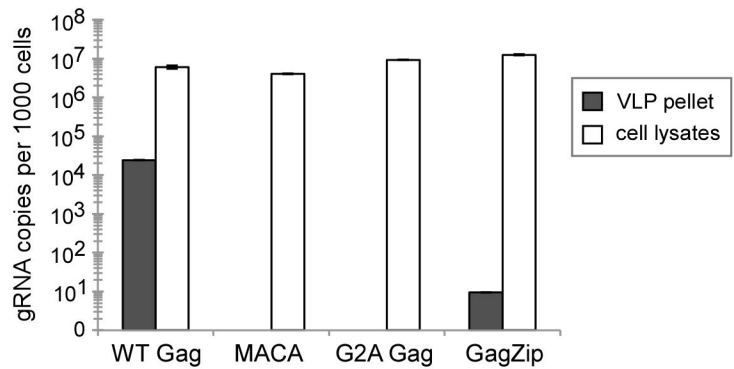

$\alpha$ Gag IP from cells:

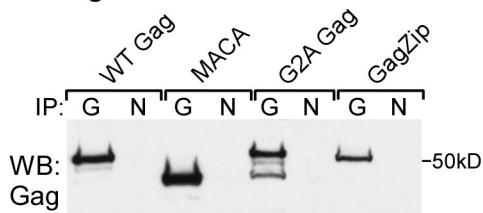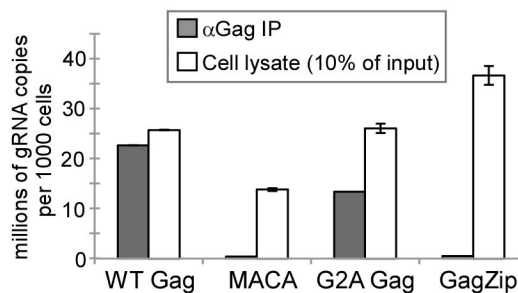



Fig. 10: Model for how HIV-1 gRNA packaging is initiated within a subclass of host RNA granules

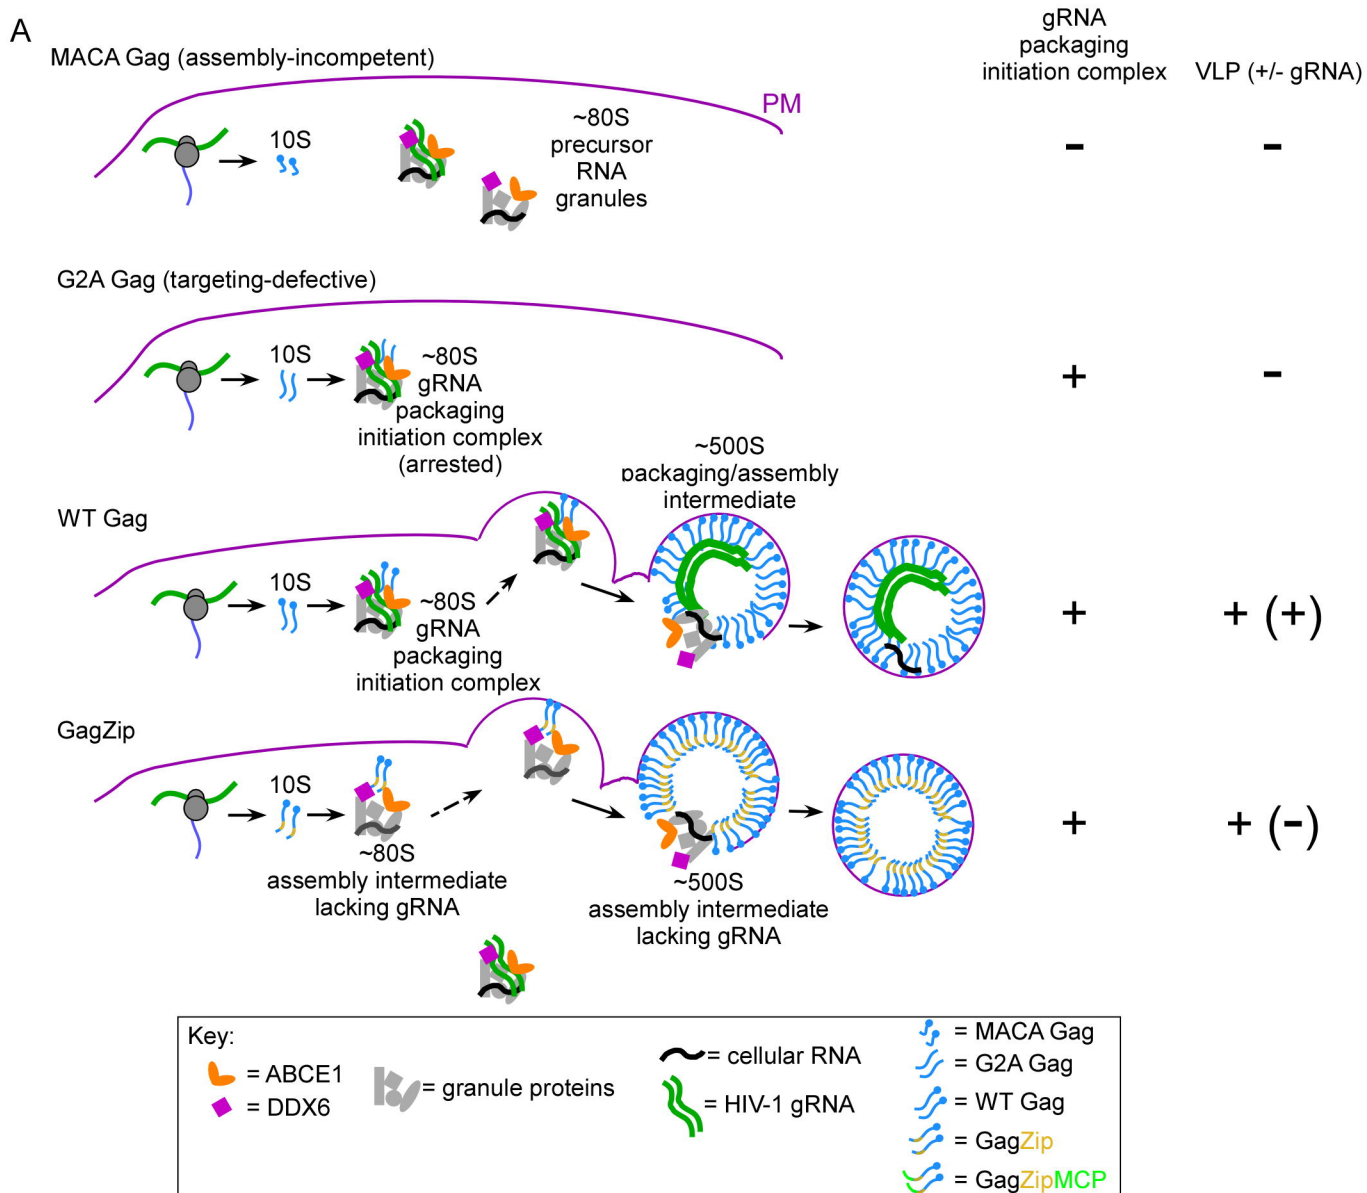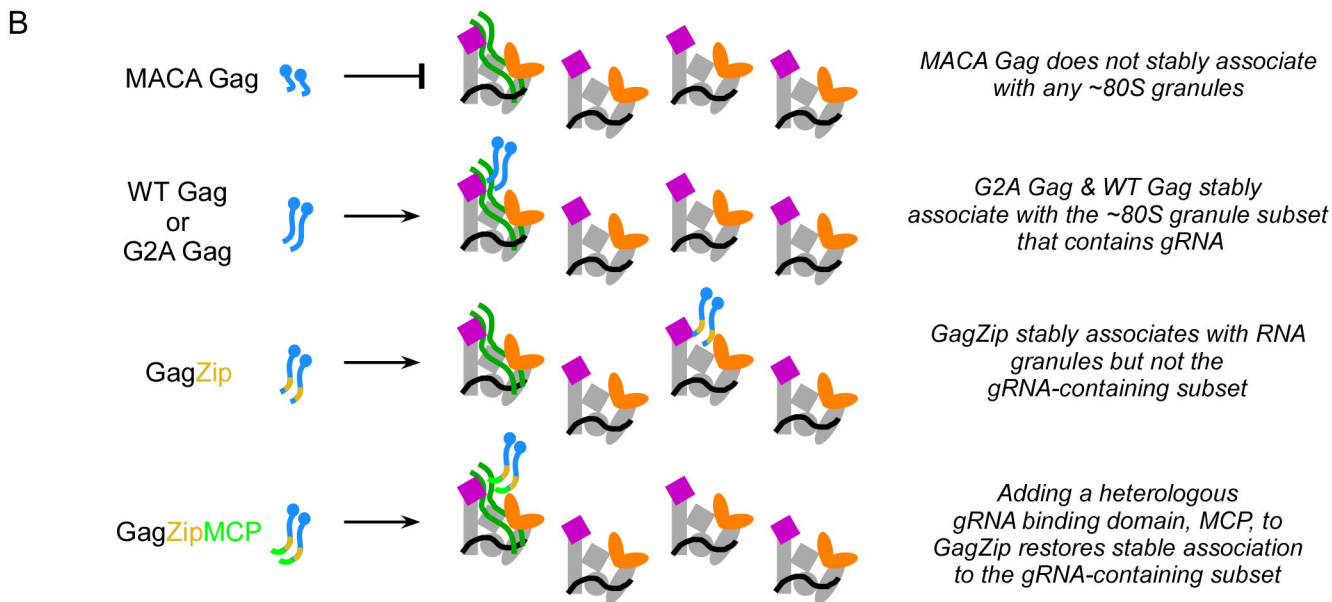

Source: http://www.biorxiv.org/content/10.1101/183855v1.full.pdf
